# Supplementary material
Source: ML conference proceedings conference paper supplement (https://openreview.net/forum?id=3dsOpH1xHK)
Supplement: supplementary_material [file Neurips2025Submissionv4_sup.pdf › Neurips2025Submissionv4_sup.pdf]

## A Additional Examples and Techniques Details

### A.1 Examples of Data-Driven Optimization in Operations Research

We now give two canonical examples of stochastic optimization problems in operations research.

**Example 2** (Multi-Product Newsvendor Problem). The newsvendor problem has the objective function  $c(\mathbf{w}, \mathbf{z}) = \mathbf{a}^\top (\mathbf{w} - \mathbf{z})^+ + \mathbf{d}^\top (\mathbf{z} - \mathbf{w})^+$ , where for each  $j \in [d_z]$ : (1)  $z^{(j)}$  is the customers' random demand of product  $j$ ; (2)  $w^{(j)}$  is the decision variable, the ordering quantity for product  $j$ ; (3)  $a^{(j)}$  is the holding cost for product  $j$ ; (4)  $d^{(j)}$  is the backlogging cost for product  $j$  and (5) the goal is to minimize the expected total cost.

Consider another classical problem in operations research, the portfolio optimization problem [Kallus and Mao, 2022, Grigas et al., 2021, Elmachetou et al., 2023].

**Example 3** (Portfolio Optimization). Let  $d_w = d_z + 1$  and denote the cost function as  $c(\mathbf{w}, \mathbf{z}) = \gamma (\mathbf{w}^\top (\mathbf{z}, -1))^2 + \exp(-\mathbf{w}^\top (\mathbf{z}, 0))$ . The decision  $\mathbf{w}$  satisfies  $(w^{(1)}, w^{(2)}, \dots, w^{(d_w-1)}) \in \mathbb{R}^{d_w-1}$ , denoting the investment fraction on products  $1, 2, \dots, d_z$  (i.e.,  $d_w - 1$ ) and  $w^{(d_w)}$  is an auxiliary decision variable. The first component represents the risk (variance) of the portfolio and the second component represents the exponential utility of the portfolio.

### A.2 Further Examples of Local Misspecification

**Example 4** (Parametric Perturbation: Quadratic Mean Differentiability (QMD) family). Suppose  $P^n = P_{\theta_0}^{\otimes n}$  for some fixed  $\theta_0$ . Consider a sequence of vectors in  $\mathbb{R}^{d_\theta}$ , say  $\{\mathbf{h}_n\}_{n=1}^\infty$ . Suppose the joint distribution of  $\{\mathbf{z}_i\}_{i=1}^n, Q^n$ , is also in the parametric family, but is of the form  $P_{\theta_0 + \mathbf{h}_n}^{\otimes n}$ . If there exists a score function  $\dot{\ell}_\theta(\mathbf{z}) : \mathcal{Z} \rightarrow \mathbb{R}^{d_\theta}$  with  $\mathbb{E}_{\theta_0}[\dot{\ell}_{\theta_0}(\mathbf{z})] = \mathbf{0}$  such that

$$\int \left( \sqrt{p_{\theta_0 + \mathbf{h}_n}} - \sqrt{p_{\theta_0}} - \frac{1}{2} \dot{\ell}_{\theta_0}^\top \mathbf{h}_n \sqrt{p_{\theta_0}} \right)^2 d\mathbf{z} = o(\|\mathbf{h}_n\|^2), \mathbf{h}_n \rightarrow \mathbf{0}.$$

In particular, in our framework, we focus on the case where  $\mathbf{h}_n = \mathbf{h}/n^\alpha$  for a fixed vector  $\mathbf{h}$ . When  $\alpha = 1/2$ , van der Vaart [2000] shows that the likelihood ratio between  $Q^n$  and  $P^n$  satisfies:

$$\log \frac{dQ^n(\mathbf{z}_1, \dots, \mathbf{z}_n)}{dP^n(\mathbf{z}_1, \dots, \mathbf{z}_n)} = \frac{1}{\sqrt{n}} \sum_{i=1}^n \mathbf{h}^\top \dot{\ell}_{\theta_0}(\mathbf{z}_i) - \frac{1}{2} \mathbf{h}^\top \mathbf{I} \mathbf{h} + o_{P^n}(\|\mathbf{h}\|^2),$$

where  $\mathbf{I} := \mathbb{E}_{\theta_0}[\dot{\ell}_{\theta_0} \dot{\ell}_{\theta_0}^\top]$  denotes the Fisher information. In other words, under  $P^n$

$$\log \frac{dQ^n(\mathbf{z}_1, \dots, \mathbf{z}_n)}{dP^n(\mathbf{z}_1, \dots, \mathbf{z}_n)} \xrightarrow{P^n} N\left(-\frac{1}{2} \mathbf{h}^\top \mathbf{I} \mathbf{h}, \mathbf{h}^\top \mathbf{I} \mathbf{h}\right),$$

where the limiting distribution is a Gaussian distribution with mean  $-\frac{1}{2} \mathbf{h}^\top \mathbf{I} \mathbf{h}$  and variance  $\mathbf{h}^\top \mathbf{I} \mathbf{h}$ .

In the previous example, the ground truth distribution  $Q$  is still in  $\{P_\theta : \theta \in \Theta\}$  but is in the local neighbourhood of  $P_{\theta_0}$ . The more common and interesting examples are when  $Q \notin \{P_\theta : \theta \in \Theta\}$  as discussed in examples below.

**Example 5** (Semi-parametric Local Perturbation: Part I). Suppose  $P_{\theta_0}$  is a given distribution, and  $u(\mathbf{z}) : \mathcal{Z} \rightarrow \mathbb{R}$  is an unobserved random variable with  $\mathbb{E}_{\theta_0}[u] = 0$  and a finite variance  $\mathbb{E}_{\theta_0}[u^2]$ . For a scalar  $t$  in a neighborhood of zero, we define the tilted distribution of  $P_{\theta_0}$ , called  $Q_t$ , as

$$dQ_t(\mathbf{z}) = \frac{\exp(tu(\mathbf{z}))}{C_t} dP_{\theta_0}(\mathbf{z})$$

where  $C_t = \int \exp(tu(\mathbf{z})) dP_{\theta_0}(\mathbf{z}) < \infty$  is a normalization constant. Clearly  $Q_{t=0} = P_{\theta_0}$ .

**Lemma 2** (Log Likelihood Ratio Property in Example 5). *Under Definition 2, when  $\alpha = 1/2$ , i.e.,  $Q^n = Q_{1/\sqrt{n}}^{\otimes n}$ , the log-likelihood ratio between  $Q^n$  and  $P^n$  satisfies:*

$$\log \frac{dQ^n(\mathbf{z}_1, \dots, \mathbf{z}_n)}{dP^n(\mathbf{z}_1, \dots, \mathbf{z}_n)} = \frac{1}{\sqrt{n}} \sum_{i=1}^n u(\mathbf{z}_i) - \frac{1}{2} \mathbb{E}_{\theta_0}[u^2] + o_{P^n}(1).$$

This implies, under  $P^n$ ,  $\log \frac{dQ^n(\mathbf{z}_1, \dots, \mathbf{z}_n)}{dP^n(\mathbf{z}_1, \dots, \mathbf{z}_n)} \xrightarrow{P^n} N\left(-\frac{1}{2} \mathbb{E}_{\theta_0}[u^2], \mathbb{E}_{\theta_0}[u^2]\right)$ .

840 **Example 6** (Semi-parametric Local Perturbation: Part II). Consider the random variable  $u(\mathbf{z}) : \mathcal{Z} \rightarrow$   
841  $\mathbb{R}$  with a zero mean,  $\mathbb{E}_{\theta_0}[u] = 0$ , and finite second moment, say  $\mathbb{E}_{\theta_0}[u^2]$ . Now we define the tilted  
842 distribution:

$$dQ_t(\mathbf{z}) = \frac{[1 + tu(\mathbf{z})]_+}{C_t} dP_{\theta_0}(\mathbf{z}) \text{ where } C_t = \int [1 + tu(\mathbf{z})]_+ dP_{\theta_0}(\mathbf{z}).$$

843 In particular, in our framework we focus on the case where  $Q = Q_{1/n^\alpha}$  and  $Q^n := Q_{1/n^\alpha}^{\otimes n}$ . When  
844  $\alpha = 1/2$ , by Duchi [2021], the log likelihood ratio satisfies

$$\log \frac{dQ^n(\mathbf{z}_1, \dots, \mathbf{z}_n)}{dP^n(\mathbf{z}_1, \dots, \mathbf{z}_n)} = \frac{1}{\sqrt{n}} \sum_{i=1}^n u(\mathbf{z}_i) - \frac{1}{2} \mathbb{E}_{\theta_0}[u^2] + o_{P^n}(1).$$

845 In other words, under  $P^n$ ,

$$\log \frac{dQ^n(\mathbf{z}_1, \dots, \mathbf{z}_n)}{dP^n(\mathbf{z}_1, \dots, \mathbf{z}_n)} \xrightarrow{P^n} N\left(-\frac{1}{2} \mathbb{E}_{\theta_0}[u^2], \mathbb{E}_{\theta_0}[u^2]\right).$$

846 **Example 7** (Semi-parametric Local Perturbation: Part III). Consider the function  $g : \mathbb{R} \rightarrow [-1, 1]$  be  
847 any three-times continuously differentiable function where  $g(x) = x$  for  $x \in [-1/2, 1/2]$  and  $g' \geq 0$   
848 and the first three derivatives of  $g$  are bounded. Consider the random variable  $u(\mathbf{z}) : \mathcal{Z} \rightarrow \mathbb{R}$  with a  
849 zero mean  $\mathbb{E}_{\theta_0}[u] = 0$  and finite second moment, say  $\mathbb{E}_{\theta_0}[u^2]$ . Now, for  $t \in \mathbb{R}$ , we define the tilted  
850 distribution

$$dQ_t(\mathbf{z}) = \frac{1 + g(tu(\mathbf{z}))}{C_t} dP_{\theta_0}(\mathbf{z}) \text{ where } C_t = 1 + \int g(tu(\mathbf{z})) dP_{\theta_0}(\mathbf{z}).$$

851 In particular, in our framework we focus on the case where  $Q = Q_{1/n^\alpha}$  and  $Q^n := Q_{1/n^\alpha}^{\otimes n}$ . When  
852  $\alpha = 1/2$ , by Duchi and Ruan [2021], the log likelihood ratio satisfies the following Property:

$$\log \frac{dQ^n(\mathbf{z}_1, \dots, \mathbf{z}_n)}{dP^n(\mathbf{z}_1, \dots, \mathbf{z}_n)} = \frac{1}{\sqrt{n}} \sum_{i=1}^n u(\mathbf{z}_i) - \frac{1}{2} \mathbb{E}_{\theta_0}[u^2] + o_{P^n}(1).$$

853 In other words, under  $P^n$ ,

$$\log \frac{dQ^n(\mathbf{z}_1, \dots, \mathbf{z}_n)}{dP^n(\mathbf{z}_1, \dots, \mathbf{z}_n)} \xrightarrow{P^n} N\left(-\frac{1}{2} \mathbb{E}_{\theta_0}[u^2], \mathbb{E}_{\theta_0}[u^2]\right).$$

854 **Example 8** (Semi-parametric Local Perturbation: Part IV (QMD Family)). Consider a scalar function  
855  $u(\mathbf{z}) : \mathcal{Z} \rightarrow \mathbb{R}$  with zero mean  $\mathbb{E}_{\theta_0}[u] = 0$  and finite second order moment  $\mathbb{E}_{\theta_0}[u^2]$ . We define  
856 a tilted distribution  $Q_t$  for  $t \in \mathbb{R}$  with probability density (mass) function  $q_t$  with respect to the  
857 dominated measure (note that  $Q_t$  is not necessarily in the parametric family  $\{P_\theta : \theta \in \Theta\}$ ) with  
858  $q_0 = p_{\theta_0}$ . We further assume the quadratic mean differentiability

$$\int \left( \sqrt{q_t} - \sqrt{p_{\theta_0}} - \frac{1}{2} t u \sqrt{p_{\theta_0}} \right)^2 d\mathbf{z} = o(t^2).$$

859 Note that when  $q_0 = p_{\theta_0}$ . In particular, in our framework we focus on the case where  $Q = Q_{1/n^\alpha}$   
860 and  $Q^n := Q_{1/n^\alpha}^{\otimes n}$ . When  $\alpha = 1/2$ , by Duchi [2021], we have

$$\log \frac{dQ^n(\mathbf{z}_1, \dots, \mathbf{z}_n)}{dP^n(\mathbf{z}_1, \dots, \mathbf{z}_n)} = \frac{1}{\sqrt{n}} \sum_{i=1}^n u(\mathbf{z}_i) - \frac{1}{2} \mathbb{E}_{\theta_0}[u^2] + o_{P^n}(1).$$

861 Note that Example 8 is the most general version and includes Example 6-7 as particular examples  
862 under some mild assumptions.

### 863 A.3 Additional Technical Details

864 We introduce standard regularity assumptions for general  $M$ -estimation problems in asymptotic  
865 statistics [van der Vaart, 2000], which include our SAA, ETO, and IEO methods as examples.

866 **Assumption 3** (Regularity Assumptions for  $M$ -estimation). Suppose the i.i.d. random variables  
867  $\{\mathbf{z}_i\}_{i=1}^n$  follows a distribution  $Q$ . Suppose the function  $\mathbf{z} \rightarrow m_\zeta(\mathbf{z})$  is measurable with respect to  $\mathbf{z}$   
868 for all  $\zeta$  and

- 869 1.  $\sup_\zeta \left| \frac{1}{n} \sum_{i=1}^n m_\zeta(\mathbf{z}_i) - \mathbb{E}_Q[m_\zeta(\mathbf{z})] \right| \xrightarrow{P} 0$ ,
- 870 2. there exists  $\zeta^* = \operatorname{argmax}_\zeta \mathbb{E}_Q[m_\zeta(\mathbf{z})]$ , for all  $\varepsilon > 0$ ,  $\sup_{\zeta: \|\zeta - \zeta^*\|} \mathbb{E}_Q[m_\zeta(\mathbf{z})] <$   
871  $\mathbb{E}_Q[m_{\zeta^*}(\mathbf{z})]$ ,
3. the mapping  $\zeta \rightarrow m_\zeta(\mathbf{z})$  is differentiable at  $\zeta^*$  for  $Q$ -almost every  $\mathbf{z}$  with derivative  $\nabla_\zeta m_{\zeta^*}(\mathbf{z})$  and such that for every  $\zeta_1$  and  $\zeta_2$  in a neighbourhood of  $\zeta^*$  and a measurable function  $K$  with  $\mathbb{E}_Q[K(\mathbf{z})^2] < \infty$

$$|m_{\zeta_1}(\mathbf{z}) - m_{\zeta_2}(\mathbf{z})| \leq K(\mathbf{z}) \|\zeta_1 - \zeta_2\|.$$

- 872 4. assume that the mapping  $\zeta \rightarrow \mathbb{E}_Q[m_\zeta(\mathbf{z})]$  admits a second-order Taylor expansion at a  
873 point of maximum  $\zeta^*$  with nonsingular symmetric second order matrix  $V_{\zeta^*}$ .

If the random sequence  $\hat{\zeta}_n$  satisfies  $\frac{1}{n} \sum_{i=1}^n m_{\hat{\zeta}_n}(\mathbf{z}_i) = \sup_\zeta \frac{1}{n} \sum_{i=1}^n m_\zeta(\mathbf{z}_i)$ , then  $\hat{\zeta}_n \xrightarrow{P} \zeta^*$  and

$$\sqrt{n} \left( \hat{\zeta}_n - \zeta^* \right) = -V_{\zeta^*}^{-1} \frac{1}{\sqrt{n}} \sum_{i=1}^n \nabla_\zeta m_{\zeta^*}(\mathbf{z}_i) + o_Q(1).$$

874 Throughout this paper, we assume Assumption 3 holds.

- 875 • For SAA, consider  $m_\zeta(\mathbf{z}) = -c(\mathbf{w}, \mathbf{z})$  with the parameter  $\zeta = \mathbf{w}$ .
- 876 • For ETO, consider  $m_\zeta(\mathbf{z}) = \log p_\theta(\mathbf{z})$  with parameter  $\zeta = \theta$ .
- 877 • For IEO, consider  $m_\zeta(\mathbf{z}) = c(\mathbf{w}_\theta, \mathbf{z})$  with  $\zeta = \theta$ .

878 When we say Assumption 3 holds, it means that Assumption 3 holds for the corresponding  $m_\zeta(\mathbf{z})$  in  
879 SAA, ETO, and IEO.

**Assumption 4** (Interchangeability). For any  $\theta \in \Theta$  and  $\mathbf{w} \in \Omega$ ,

$$\begin{aligned} \nabla_\theta \int \nabla_{\mathbf{w}} c(\mathbf{w}, \mathbf{z})^\top p_\theta(\mathbf{z}) d\mathbf{z} &= \int \nabla_{\mathbf{w}} c(\mathbf{w}, \mathbf{z})^\top \nabla_\theta p_\theta(\mathbf{z}) d\mathbf{z}, \\ \int \nabla_{\mathbf{w}} c(\mathbf{w}, \mathbf{z}) p_\theta(\mathbf{z}) d\mathbf{z} |_{\mathbf{w}=\mathbf{w}^*} &= \nabla_{\mathbf{w}} \int c(\mathbf{w}, \mathbf{z}) p_\theta(\mathbf{z}) d\mathbf{z} |_{\mathbf{w}=\mathbf{w}^*} \end{aligned}$$

880 The interchangeability condition in Assumption 4 is a standard assumption in the Cramer-Rao  
881 bound [Bickel and Doksum, 2015]. A standard route to check the interchangeability condition  
882 is to use the dominated convergence theorem. For instance, we provide a way to check the first  
883 interchange equation. If  $p_\theta(\mathbf{z})$  is continuously differentiable with respect to  $\theta$ , and there exists a real-  
884 valued function  $q(\mathbf{z})$  such that  $\int \nabla_{\mathbf{w}} c(\mathbf{w}, \mathbf{z})^\top q(\mathbf{z}) d\mathbf{z} < +\infty$  and  $\|\nabla_\theta p_\theta(\mathbf{z})\|_\infty \leq q(\mathbf{z})$ , then we  
885 have  $\nabla_\theta \int \nabla_{\mathbf{w}} c(\mathbf{w}, \mathbf{z})^\top p_\theta(\mathbf{z}) d\mathbf{z} = \int \nabla_{\mathbf{w}} c(\mathbf{w}, \mathbf{z})^\top \nabla_\theta p_\theta(\mathbf{z}) d\mathbf{z}$ . Other sufficient conditions (more  
886 delicate but still based on the dominated convergence theorem) can be found in L'Ecuyer [1990],  
887 Asmussen and Glynn [2007], Glasserman [2004].

888 Next, we present some auxiliary lemmas that are helpful for deriving our theorems.

889 The first is a classic lemma in asymptotic statistics, called Le Cam's third lemma (Example 6.7 in  
890 van der Vaart [2000]).

891 **Lemma 3** (Le Cam's third lemma). Let  $P^n$  and  $Q^n$  be sequences of probability measures on  
892 measurable spaces  $(\Omega_n, \mathcal{F}_n)$  and let  $X_n$  be a sequence of random vectors. Suppose that

$$\left( X_n, \log \frac{dQ^n}{dP^n} \right) \xrightarrow{P^n} N \left( \begin{pmatrix} \boldsymbol{\mu} \\ -\frac{1}{2} \boldsymbol{\sigma}^2 \end{pmatrix}, \begin{pmatrix} \boldsymbol{\Sigma} & \boldsymbol{\tau} \\ \boldsymbol{\tau}^\top & \boldsymbol{\sigma}^2 \end{pmatrix} \right),$$

893 then

$$X_n \xrightarrow{Q^n} N(\boldsymbol{\mu} + \boldsymbol{\tau}, \boldsymbol{\Sigma}).$$

894 We now state a auxiliary lemma about the directional differentiability of the optimal solutions to  
 895 stochastic optimization problems.

**Lemma 4** (Directional differentiability of optimal solutions: Part I). *Consider the distribution  $Q_t(z)$  in Definition 1. Let*

$$\mathbf{w}_t := \operatorname{argmin}_{\mathbf{w} \in \Omega} \mathbb{E}_{Q_t} [c(\mathbf{w}, z)].$$

896 Then

$$\lim_{t \rightarrow 0} \frac{1}{t} (\mathbf{w}_t - \mathbf{w}_0) = \mathbb{E}_{\theta_0} [u(z) \text{IF}^{\text{SAA}}(z)].$$

897 Equipped with the lemma above, we can get the convergence of  $n^\alpha (\mathbf{w}_n^* - \mathbf{w}_{\theta_0})$  under the three  
 898 locally misspecified regimes:

$$\lim_{n \rightarrow \infty} n^\alpha (\mathbf{w}_n^* - \mathbf{w}_{\theta_0}) = \lim_{t \rightarrow 0} \frac{1}{t} (\mathbf{w}_t - \mathbf{w}_0) = \mathbb{E}_{\theta_0} [u(z) \text{IF}^{\text{SAA}}(z)].$$

899 *Proof of Lemma 4.* Note that  $\mathbf{w}_n^*$  is the minimizer of  $\mathbb{E} [c(\mathbf{w}, z)]$  under  $Q^n$  while  $\mathbf{w}_{\theta_0}$  under  $P^n$ . We  
 900 will use the directional differentiability of optimal solution to derive this fact.

901 We recall  $Q_0 = P_{\theta_0}$  with density  $q_0(z) = p_{\theta_0}(z)$  and  $dQ_t(z) = dP_{\theta_0}(z) \frac{\exp(tu(z))}{C_t}$ ,  $C_t =$   
 902  $\int \exp(tu(z)) dP_{\theta_0}(z)$ . In this case, we denote  $v(\mathbf{w}, Q_t)$  as  $\mathbb{E}_{Q_t} [c(\mathbf{w}, z)]$ ,  $\mathcal{G}(\mathbf{w}, t) := \nabla_{\mathbf{w}} v(\mathbf{w}, Q_t)$   
 903 and  $\mathbf{w}_t := \operatorname{argmin}_{\mathbf{w}} v(\mathbf{w}, Q_t)$ . Note that  $\mathcal{G}(\mathbf{w}_t, t) = 0$  for all  $t$ . By implicit function theorem,

$$\begin{aligned} \lim_{t \rightarrow 0} \frac{1}{t} (\mathbf{w}_t - \mathbf{w}_0) &= -[\nabla_{\mathbf{w}} \mathcal{G}(\mathbf{w}_{\theta_0}, 0)]^{-1} \frac{\partial}{\partial t} \nabla_{\mathbf{w}} v(\mathbf{w}_{\theta_0}, Q_t)|_{t=0} \\ &= -\nabla_{\mathbf{w}\mathbf{w}} \mathbb{E}_{\theta_0} [c(\mathbf{w}_{\theta_0}, z)] \frac{\partial}{\partial t} \nabla_{\mathbf{w}} v(\mathbf{w}_{\theta_0}, Q_t)|_{t=0} \\ &= -\mathbf{V}^{-1} \frac{\partial}{\partial t} \int \nabla_{\mathbf{w}} c(\mathbf{w}_{\theta_0}, z) dQ_t(z)|_{t=0} \\ &= -\mathbf{V}^{-1} \int \nabla_{\mathbf{w}} c(\mathbf{w}_{\theta_0}, z) \frac{\partial}{\partial t} dQ_t(z)|_{t=0}. \end{aligned}$$

904 From Definition 1, we know that for almost every  $z$ ,  $\frac{\partial}{\partial t} \log q_t(z)|_{t=0} = u(z)$ . Hence, we have for  
 905 almost every  $z$ ,

$$\frac{\partial}{\partial t} q_t(z) \Big|_{t=0} = q_0(z) u(z). \quad (3)$$

906 In conclusion,

$$\begin{aligned} & -\mathbf{V}^{-1} \int \nabla_{\mathbf{w}} c(\mathbf{w}_{\theta_0}, z) \frac{\partial}{\partial t} dQ_t(z)|_{t=0} \\ &= -\mathbf{V}^{-1} \int \nabla_{\mathbf{w}} c(\mathbf{w}_{\theta_0}, z) \{q_0(z) u(z)\} dz \end{aligned}$$

Since

$$\int \nabla_{\mathbf{w}} c(\mathbf{w}_{\theta_0}, z) \left[ \int q_0(z) u(z) dz \right] q_0(z) dz = \left[ \int q_0(z) u(z) dz \right] \nabla_{\mathbf{w}} \mathbb{E}_{\theta_0} [c(\mathbf{w}_{\theta_0}, z)] = 0$$

and

$$\int \nabla_{\mathbf{w}} c(\mathbf{w}_{\theta_0}, z) q_0(z) u(z) dz = \mathbb{E}_{\theta_0} [u(z) \nabla_{\mathbf{w}} c(\mathbf{w}_{\theta_0}, z)],$$

we have

$$-\mathbf{V}^{-1} \int \nabla_{\mathbf{w}} c(\mathbf{w}_{\theta_0}, z) \frac{\partial}{\partial t} dQ_t(z)|_{t=0} = -\mathbf{V}^{-1} \mathbb{E}_{\theta_0} [u(z) \nabla_{\mathbf{w}} c(\mathbf{w}_{\theta_0}, z)] = \mathbb{E}_{\theta_0} [u(z) \text{IF}^{\text{SAA}}(z)].$$

Therefore,

$$\lim_{n \rightarrow \infty} \sqrt{n} (\mathbf{w}_n^* - \mathbf{w}_{\theta_0}) = \lim_{t \rightarrow 0} \frac{1}{t} (\mathbf{w}_t - \mathbf{w}_0) = \mathbb{E}_{\theta_0} [u(z) \text{IF}^{\text{SAA}}(z)].$$

907 More generally, under severely and mildly specified regime, we have further

$$\lim_{n \rightarrow \infty} n^\alpha (\mathbf{w}_n^* - \mathbf{w}_{\theta_0}) = \mathbb{E}_{\theta_0} [u(z) \text{IF}^{\text{SAA}}(z)].$$

908

□

909 We note that Lemma 4 holds for Example 5. To be more specific,

$$q_t(z) = \frac{\exp(tu(z))}{C_t} q_0(z) \text{ where } C_t = \int \exp(tu(z)) q_0(z) dz.$$

910 Therefore, the derivative of  $q_t(z)$  with respect to  $t$  is

$$\begin{aligned} \frac{\partial}{\partial t} q_t(z) &= \frac{q_0(z) \exp(tu(z)) u(z) \left[ \int \exp(tu(z)) q_0(z) dz \right]}{\left[ \int \exp(tu(z)) q_0(z) dz \right]^2} \\ &\quad - \frac{\left[ \int \exp(tu(z)) q_0(z) u(z) dz \right] q_0(z) \exp(tu(z))}{\left[ \int \exp(tu(z)) q_0(z) dz \right]^2}. \end{aligned}$$

911 At  $t = 0$ , since  $\mathbb{E}_{\theta_0}[u] = 0$ , we have for almost every  $z$ ,

$$\left. \frac{\partial}{\partial t} q_t(z) \right|_{t=0} = q_0(z) u(z) - \left[ \int q_0(z) u(z) dz \right] q_0(z) = q_0(z) u(z).$$

912 It is also possible to extend the result to other examples under additional regularity assumptions.

913 For Example 6, the result still holds. Recall that

$$q_t(z) = \frac{[1 + tu(z)]_+}{C_t} q_0(z), \quad C_t = \int [1 + tu(z)]_+ q_0(z) dz.$$

914 Hence,

$$\begin{aligned} \left. \frac{\partial}{\partial t} q_t(z) \right|_{t=0} &= q_0(z) \frac{C_t \frac{\partial}{\partial t} [1 + tu(z)]_+ - [1 + tu(z)]_+ \frac{\partial}{\partial t} C_t}{C_t^2} \Big|_{t=0} \\ &= q_0(z) \left( \left. \frac{\partial}{\partial t} [1 + tu(z)]_+ \right|_{t=0} - \left. \frac{\partial}{\partial t} C_t \right|_{t=0} \right) \\ &= q_0(z) \left( u(z) \mathbb{1}_{\{1 + tu(z) \geq 0\}} \Big|_{t=0} - \int u(z) \mathbb{1}_{\{1 + tu(z) \geq 0\}} \Big|_{t=0} q_0(z) dz \right) \\ &= q_0(z) \left( u(z) - \int u(z) q_0(z) dz \right). \end{aligned}$$

915 The result is the same as (3) and the conclusion of Lemma 4 still holds.

916 For Example 7, the result still holds. Recall that

$$q_t(z) = \frac{1 + g(tu(z))}{C_t} q_0(z), \quad C_t = \int (1 + g(tu(z))) q_0(z) dz.$$

917 Hence, by noting that  $g'(0) = 1$ ,

$$\begin{aligned} \left. \frac{\partial}{\partial t} q_t(z) \right|_{t=0} &= q_0(z) \frac{C_t \frac{\partial}{\partial t} (1 + g(tu(z))) - (1 + g(tu(z))) \frac{\partial}{\partial t} C_t}{C_t^2} \Big|_{t=0} \\ &= q_0(z) \left( \left. \frac{\partial}{\partial t} (1 + g(tu(z))) \right|_{t=0} - \left. \frac{\partial}{\partial t} C_t \right|_{t=0} \right) \\ &= q_0(z) \left( u(z) g'(0) - \int u(z) g'(0) q_0(z) dz \right) \\ &= q_0(z) \left( u(z) - \int u(z) q_0(z) dz \right). \end{aligned}$$

918 The result is the same as (3) and the conclusion of Lemma 4 still holds.

919 We provide another auxiliary lemma similar to Lemma 4.

920 **Lemma 5** (Directional differentiability of optimal solutions: Part II). *Consider the distribution  $Q_t$  in*  
 921 *Definition 1 where  $Q_0 = P_{\theta_0}$ . We denote*

$$\begin{aligned} \theta_t^{\text{KL}} &:= \operatorname{argmax}_{\theta \in \Theta} \mathbb{E}_{Q_t} [\log p_{\theta}(z)], \\ \theta_t^* &:= \operatorname{argmin}_{\theta \in \Theta} \mathbb{E}_{Q_t} [c(\mathbf{w}_{\theta}, z)]. \end{aligned}$$

922 Then we have

$$\begin{aligned}\nabla_t \boldsymbol{\theta}_t^{\text{KL}} &:= \lim_{t \rightarrow 0} \frac{1}{t} (\boldsymbol{\theta}_t^{\text{KL}} - \boldsymbol{\theta}_0) = \mathbb{E}_{\boldsymbol{\theta}_0}[u(\mathbf{z}) \text{IF}^{\text{ETO}}(\mathbf{z})], \\ \nabla_t \boldsymbol{\theta}_t^* &:= \lim_{t \rightarrow 0} \frac{1}{t} (\boldsymbol{\theta}_t^* - \boldsymbol{\theta}_0) = \mathbb{E}_{\boldsymbol{\theta}_0}[u(\mathbf{z}) \text{IF}^{\text{IEO}}(\mathbf{z})].\end{aligned}$$

923 *Proof of Lemma 5.* We denote  $v^{\text{KL}}(\boldsymbol{\theta}, Q_t)$  as  $\mathbb{E}_{Q_t}[\log p_{\boldsymbol{\theta}}(\mathbf{z})]$ ,  $\mathcal{G}^{\text{KL}}(\boldsymbol{\theta}, t) := \nabla_{\boldsymbol{\theta}} v^{\text{KL}}(\boldsymbol{\theta}, Q_t)$  and  
924  $\boldsymbol{\theta}_t^{\text{KL}} := \text{argmin } v^{\text{KL}}(\boldsymbol{\theta}, Q_t)$ . Note that  $\mathcal{G}^{\text{KL}}(\boldsymbol{\theta}_t^{\text{KL}}, t) = 0$  for all  $t$ . By implicit function theorem,

$$\begin{aligned}\lim_{t \rightarrow 0} \frac{1}{t} (\boldsymbol{\theta}_t^{\text{KL}} - \boldsymbol{\theta}_0) &= -[\nabla_{\boldsymbol{\theta}} \mathcal{G}^{\text{KL}}(\boldsymbol{\theta}_0, 0)]^{-1} \frac{\partial}{\partial t} \nabla_{\boldsymbol{\theta}} v^{\text{KL}}(\boldsymbol{\theta}_0, Q_t)|_{t=0} \\ &= -\nabla_{\boldsymbol{\theta}\boldsymbol{\theta}} \mathbb{E}_{\boldsymbol{\theta}_0}[\log p_{\boldsymbol{\theta}_0}(\mathbf{z})]^{-1} \frac{\partial}{\partial t} \nabla_{\boldsymbol{\theta}} v^{\text{KL}}(\boldsymbol{\theta}_0, Q_t)|_{t=0} \\ &= \mathbf{I}^{-1} \frac{\partial}{\partial t} \int s_{\boldsymbol{\theta}_0}(\mathbf{z}) dQ_t(\mathbf{z})|_{t=0} \\ &= \mathbf{I}^{-1} \int s_{\boldsymbol{\theta}_0}(\mathbf{z}) \frac{\partial}{\partial t} dQ_t(\mathbf{z})|_{t=0}.\end{aligned}$$

925 At  $t = 0$ , by (3),

$$\left. \frac{\partial}{\partial t} q_t(\mathbf{z}) \right|_{t=0} = q_0(\mathbf{z}) u(\mathbf{z}).$$

926 In conclusion,

$$\begin{aligned}\mathbf{I}^{-1} \int s_{\boldsymbol{\theta}_0}(\mathbf{z}) \frac{\partial}{\partial t} dQ_t(\mathbf{z})|_{t=0} \\ = \mathbf{I}^{-1} \int s_{\boldsymbol{\theta}_0}(\mathbf{z}) \{q_0(\mathbf{z}) h^{\top} u(\mathbf{z})\} d\mathbf{z}.\end{aligned}$$

Since

$$\int s_{\boldsymbol{\theta}_0}(\mathbf{z}) \left[ \int q_0(\mathbf{z}) u(\mathbf{z}) d\mathbf{z} \right] q_0(\mathbf{z}) d\mathbf{z} = \left[ \int q_0(\mathbf{z}) u(\mathbf{z}) d\mathbf{z} \right] \mathbb{E}_{\boldsymbol{\theta}_0}[s_{\boldsymbol{\theta}_0}(\mathbf{z})] = \mathbf{0}$$

and

$$\int s_{\boldsymbol{\theta}_0}(\mathbf{z}) q_0(\mathbf{z}) u(\mathbf{z}) d\mathbf{z} = \mathbb{E}_{\boldsymbol{\theta}_0}[u(\mathbf{z}) s_{\boldsymbol{\theta}_0}(\mathbf{z})],$$

we have

$$\lim_{t \rightarrow 0} \frac{1}{t} (\boldsymbol{\theta}_t^{\text{KL}} - \boldsymbol{\theta}_0) = \mathbf{I}^{-1} \int s_{\boldsymbol{\theta}_0}(\mathbf{z}) \frac{\partial}{\partial t} dQ_t(\mathbf{z})|_{t=0} = \mathbf{I}^{-1} \mathbb{E}_{\boldsymbol{\theta}_0}[u(\mathbf{z}) s_{\boldsymbol{\theta}_0}(\mathbf{z})].$$

927 Similarly, we denote  $v^*(\boldsymbol{\theta}, Q_t)$  as  $\mathbb{E}_{Q_t}[c(\mathbf{w}_{\boldsymbol{\theta}}, \mathbf{z})]$ ,  $\mathcal{G}^*(\boldsymbol{\theta}, t) := \nabla_{\boldsymbol{\theta}} v^*(\boldsymbol{\theta}, Q_t)$  and  $\boldsymbol{\theta}_t^* :=$   
928  $\text{argmin } v^*(\boldsymbol{\theta}, Q_t)$ . Note that  $\mathcal{G}^*(\boldsymbol{\theta}_t^*, t) = 0$  for all  $t$ . By implicit function theorem,

$$\begin{aligned}\lim_{t \rightarrow 0} \frac{1}{t} (\boldsymbol{\theta}_t^* - \boldsymbol{\theta}_0) &= -[\nabla_{\boldsymbol{\theta}} \mathcal{G}^*(\boldsymbol{\theta}_0, 0)]^{-1} \frac{\partial}{\partial t} \nabla_{\boldsymbol{\theta}} v^*(\boldsymbol{\theta}_0, Q_t)|_{t=0} \\ &= -\nabla_{\boldsymbol{\theta}\boldsymbol{\theta}} \mathbb{E}_{\boldsymbol{\theta}_0}[c(\mathbf{w}_{\boldsymbol{\theta}_0}, \mathbf{z})]^{-1} \frac{\partial}{\partial t} \nabla_{\boldsymbol{\theta}} v^*(\boldsymbol{\theta}_0, Q_t)|_{t=0} \\ &= -\boldsymbol{\Phi}^{-1} \frac{\partial}{\partial t} \int \nabla_{\boldsymbol{\theta}} c(\mathbf{w}_{\boldsymbol{\theta}_0}, \mathbf{z}) dQ_t(\mathbf{z})|_{t=0} \\ &= -\boldsymbol{\Phi}^{-1} \int \nabla_{\boldsymbol{\theta}} c(\mathbf{w}_{\boldsymbol{\theta}_0}, \mathbf{z}) \frac{\partial}{\partial t} dQ_t(\mathbf{z})|_{t=0}.\end{aligned}$$

929 At  $t = 0$ , by (3),

$$\left. \frac{\partial}{\partial t} q_t(\mathbf{z}) \right|_{t=0} = q_0(\mathbf{z}) u(\mathbf{z}).$$

930 In conclusion,

$$\begin{aligned}-\boldsymbol{\Phi}^{-1} \int \nabla_{\boldsymbol{\theta}} c(\mathbf{w}_{\boldsymbol{\theta}_0}, \mathbf{z}) \frac{\partial}{\partial t} dQ_t(\mathbf{z})|_{t=0} \\ = -\boldsymbol{\Phi}^{-1} \int \nabla_{\boldsymbol{\theta}} c(\mathbf{w}_{\boldsymbol{\theta}_0}, \mathbf{z}) \{q_0(\mathbf{z}) u(\mathbf{z})\} d\mathbf{z}.\end{aligned}$$

Since

$$\int \nabla_{\theta} c(\mathbf{w}_{\theta_0}, \mathbf{z}) q_0(\mathbf{z}) u(\mathbf{z}) d\mathbf{z} = \mathbb{E}_{\theta_0} [u(\mathbf{z}) \nabla_{\theta} c(\mathbf{w}_{\theta_0}, \mathbf{z})],$$

we have

$$\lim_{t \rightarrow 0} \frac{1}{t} (\theta_t^* - \theta_0) = -\Phi^{-1} \int \nabla_{\theta} c(\mathbf{w}_{\theta_0}, \mathbf{z}) \frac{\partial}{\partial t} dQ_t(\mathbf{z})|_{t=0} = -\Phi^{-1} \mathbb{E}_{\theta_0} [u(\mathbf{z}) \nabla_{\theta} c(\mathbf{w}_{\theta_0}, \mathbf{z})].$$

931

□

932 We remark that Lemma 5 also holds for  $Q_t$  in Example 6 and 7.

## 933 B Proofs

934 In this section, we supplement the proof of the results in this paper.

935 *Proof of Theorem 6.* We first notice the fact that, in the mildly misspecified regime, by defining  
936  $h_n = 1/(n^{\alpha-1/2}) = o(1)$ , we have

$$\log \frac{dQ^n(\mathbf{z}_1, \dots, \mathbf{z}_n)}{dP^n(\mathbf{z}_1, \dots, \mathbf{z}_n)} = \frac{1}{\sqrt{n}} \sum_{i=1}^n h_n u(\mathbf{z}_i) - \frac{1}{2} \mathbb{E}_{\theta_0} [u^2] h_n^2 + o_{P^n}(h_n) = o_{P^n}(1).$$

937 In the mild misspecified case, under  $P^n$ , we have a joint central limit theorem

$$\begin{bmatrix} \sqrt{n}(\hat{\mathbf{w}}^{\square} - \mathbf{w}_{\theta_0}) \\ \log \frac{dQ^n}{dP^n} \end{bmatrix} \xrightarrow{P^n} N \left( \begin{bmatrix} 0 \\ 0 \end{bmatrix}, \begin{bmatrix} \text{var}_{\theta_0}(\text{IF}^{\square}(\mathbf{z})) & 0 \\ 0 & 0 \end{bmatrix} \right).$$

938 Using LeCam's third lemma, we change the measure from  $P^n$  to  $Q^n$  and get that under  $Q^n$ ,

$$\sqrt{n}(\hat{\mathbf{w}}^{\square} - \mathbf{w}_{\theta_0}) \xrightarrow{Q^n} N(0, \text{var}_{\theta_0}(\text{IF}^{\square}(\mathbf{z}))).$$

939 Using the same technique,

$$\begin{aligned} n^{\alpha}(\mathbf{w}_n^* - \mathbf{w}_{\theta_0}) &\rightarrow \mathbb{E}_{\theta_0} [u(\mathbf{z}) \text{IF}^{\text{SAA}}(\mathbf{z})], \\ \sqrt{n}(\mathbf{w}_n^* - \mathbf{w}_{\theta_0}) &\rightarrow \mathbf{0}. \end{aligned}$$

940 In conclusion,

$$\sqrt{n}(\hat{\mathbf{w}}^{\square} - \mathbf{w}_n^*) = \sqrt{n}(\hat{\mathbf{w}}^{\square} - \mathbf{w}_{\theta_0}) - \sqrt{n}(\mathbf{w}_n^* - \mathbf{w}_{\theta_0}) \xrightarrow{Q^n} N(0, \text{var}_{\theta_0}(\text{IF}^{\square}(\mathbf{z}))).$$

941 Let us now consider the regret. We use Taylor expansion of the regret with respect to  $\mathbf{w}$  at  $\mathbf{w}_n^*$  and  
942 note that  $\nabla_{\mathbf{w}} v_n(\mathbf{w}_n^*) = 0$  for every  $n$ ,

$$\begin{aligned} v_n(\hat{\mathbf{w}}^{\square}) - v_n(\mathbf{w}_n^*) &= \frac{1}{2} (\hat{\mathbf{w}}^{\square} - \mathbf{w}_n^*)^{\top} \nabla_{\mathbf{w}\mathbf{w}} v_n(\mathbf{w}_n^*) (\hat{\mathbf{w}}^{\square} - \mathbf{w}_n^*) + o_{Q^n}(\|\hat{\mathbf{w}}^{\square} - \mathbf{w}_n^*\|^2), \\ n(v_n(\hat{\mathbf{w}}^{\square}) - v_n(\mathbf{w}_n^*)) &= \frac{1}{2} \sqrt{n} (\hat{\mathbf{w}}^{\square} - \mathbf{w}_n^*)^{\top} \nabla_{\mathbf{w}\mathbf{w}} v_n(\mathbf{w}_n^*) \sqrt{n} (\hat{\mathbf{w}}^{\square} - \mathbf{w}_n^*) + o_{Q^n}(1). \end{aligned}$$

943 By Assumption 2 that  $\nabla_{\mathbf{w}\mathbf{w}} v_n(\mathbf{w}_n^*) \rightarrow \mathbf{V}$ , the function  $f : \Omega \rightarrow \mathbb{R}$  with  $f(\cdot) := \frac{1}{2}(\cdot)^{\top} \mathbf{V}(\cdot)$   
944 and function sequence  $f_n : \Omega \rightarrow \mathbb{R}$  with  $f_n(\cdot) := \frac{1}{2}(\cdot)^{\top} \nabla_{\mathbf{w}\mathbf{w}} v_n(\mathbf{w}_n^*)(\cdot)$  satisfy: for all sequence  
945  $\{\mathbf{w}_n\}_{n=1}^{\infty}$ , if  $\mathbf{w}_n \rightarrow \mathbf{w}$  for some  $\mathbf{w} \in \Omega$ , then  $f_n(\mathbf{w}_n) \rightarrow f(\mathbf{w})$  since continuity is preserved under  
946 multiplication. Using the extended continuous mapping theorem (Theorem 1.11.1 in van der Vaart  
947 and Wellner [1996]), we have under  $Q^n$ ,

$$n(v_n(\hat{\mathbf{w}}^{\square}) - v_n(\mathbf{w}_n^*)) \xrightarrow{Q^n} \frac{1}{2} N^{\square} \mathbf{V} N^{\square}.$$

948 Moreover, ETO is stochastically dominated by IEO and IEO is stochastically dominated by SAA. □

949 *Proof of Proposition 1.* The asymptotic normality result is directly from van der Vaart [2000] by  
 950 noting Lemma 1.

951 The asymptotic normality of SAA is by Proposition 2A of Elmachoub et al. [2023]. For ETO and  
 952 IEO, Proposition 2B and 2C of Elmachoub et al. [2023] shows that

$$\begin{aligned}\sqrt{n}(\hat{\theta}^{\text{ETO}} - \theta_0) &\xrightarrow{P^n} N(\mathbf{0}, \mathbf{I}^{-1}), \\ \sqrt{n}(\hat{\theta}^{\text{IEO}} - \theta_0) &\xrightarrow{P^n} N(\mathbf{0}, \Phi^{-1} \text{var}_{\theta_0}(\nabla_{\theta} c(\mathbf{w}_{\theta_0}, \mathbf{z})) \Phi^{-1}).\end{aligned}$$

953 Regarding the notation,  $\text{var}_{\theta_0}(\nabla_{\theta} c(\mathbf{w}_{\theta_0}, \mathbf{z}))$  is the variance of the random gradient  $\nabla_{\theta} c(\mathbf{w}_{\theta}, \mathbf{z})$  at  
 954  $\theta = \theta_0$ , under the distribution  $P_{\theta_0}$ . Note that the subscript  $\theta_0$  under the variance is not a variable  
 955 here. Using the delta method, we have

$$\begin{aligned}\sqrt{n}(\hat{\theta}^{\text{ETO}} - \theta_0) &\xrightarrow{P^n} N(\mathbf{0}, \nabla_{\theta} \mathbf{w}_{\theta_0}^{\top} \mathbf{I}^{-1} \nabla_{\theta} \mathbf{w}_{\theta_0}) = N(\mathbf{0}, \mathbf{V}^{-1} \Sigma \mathbf{I}^{-1} \Sigma^{\top} \mathbf{V}^{-1}) = N(0, \text{var}_{\theta_0}(\text{IF}^{\text{ETO}}(\mathbf{z}))), \\ \sqrt{n}(\hat{\theta}^{\text{IEO}} - \theta_0) &\xrightarrow{P^n} N(\mathbf{0}, \nabla_{\theta} \mathbf{w}_{\theta_0}^{\top} \Phi^{-1} \text{var}_{\theta_0}(\nabla_{\theta} c(\mathbf{w}_{\theta_0}, \mathbf{z})) \Phi^{-1} \nabla_{\theta} \mathbf{w}_{\theta_0}) \\ &= N(\mathbf{0}, \mathbf{V}^{-1} \Sigma \Phi^{-1} \text{var}_{\theta_0}(\nabla_{\theta} c(\mathbf{w}_{\theta_0}, \mathbf{z})) \Phi^{-1} \Sigma^{\top} \mathbf{V}^{-1}) \\ &= N(0, \text{var}_{\theta_0}(\text{IF}^{\text{IEO}}(\mathbf{z}))).\end{aligned}$$

956 The inequality  $\text{var}_{\theta_0}(\text{IF}^{\text{ETO}}(\mathbf{z})) \leq \text{var}_{\theta_0}(\text{IF}^{\text{IEO}}(\mathbf{z})) \leq \text{var}_{\theta_0}(\text{IF}^{\text{SAA}}(\mathbf{z}))$  is from Theorem 2 of  
 957 Elmachoub et al. [2023].  $\square$

958 *Proof of Theorem 3.* We use a different decomposition framework this time. We recall

$$\begin{aligned}\theta_t^{\text{KL}} &:= \underset{\theta \in \Theta}{\operatorname{argmax}} \mathbb{E}_{Q_t}[\log p_{\theta}(\mathbf{z})], \\ \theta_t^* &:= \underset{\theta \in \Theta}{\operatorname{argmin}} \mathbb{E}_{Q_t}[c(\mathbf{w}_{\theta}, \mathbf{z})], \\ \mathbf{w}_t^* &:= \underset{\mathbf{w} \in \Omega}{\operatorname{argmin}} \mathbb{E}_{Q_t}[c(\mathbf{w}, \mathbf{z})].\end{aligned}$$

959 We denote  $t_n := 1/n^{\alpha}$ . Note that here  $\mathbf{w}_{t_n}^* = \mathbf{w}_n^*$  but generally  $\mathbf{w}_{\theta_{t_n}^{\text{KL}}} \neq \mathbf{w}_n^*$ ,  $\mathbf{w}_{\theta_{t_n}^*} \neq \mathbf{w}_n^*$ . In this  
 960 case,

$$\begin{aligned}\hat{\mathbf{w}}^{\text{ETO}} - \mathbf{w}_n^* &= (\hat{\mathbf{w}}^{\text{ETO}} - \mathbf{w}_{\theta_{t_n}^{\text{KL}}}) + (\mathbf{w}_{\theta_{t_n}^{\text{KL}}} - \mathbf{w}_{\theta_0}) - (\mathbf{w}_n^* - \mathbf{w}_{\theta_0}), \\ \hat{\mathbf{w}}^{\text{IEO}} - \mathbf{w}_n^* &= (\hat{\mathbf{w}}^{\text{IEO}} - \mathbf{w}_{\theta_{t_n}^*}) + (\mathbf{w}_{\theta_{t_n}^*} - \mathbf{w}_{\theta_0}) - (\mathbf{w}_n^* - \mathbf{w}_{\theta_0}), \\ \hat{\mathbf{w}}^{\text{SAA}} - \mathbf{w}_n^* &= (\hat{\mathbf{w}}^{\text{SAA}} - \mathbf{w}_{t_n}^*) + (\mathbf{w}_{t_n}^* - \mathbf{w}_{\theta_0}) - (\mathbf{w}_n^* - \mathbf{w}_{\theta_0}).\end{aligned}$$

961 We already show in Lemma 4 that

$$n^{\alpha}(\mathbf{w}_n^* - \mathbf{w}_{\theta_0}) \rightarrow \mathbb{E}_{\theta_0}[u(\mathbf{z}) \text{IF}^{\text{SAA}}(\mathbf{z})].$$

962 Next we give a limit of the middle term, using Taylor expansion. For SAA, the middle term is equal  
 963 to the third term. For ETO and IEO,  $\mathbf{w}_{\theta_0} = \mathbf{w}_{\theta_t^*}|_{t=0}$  and  $\mathbf{w}_{\theta_0} = \mathbf{w}_{\theta_t^{\text{KL}}}|_{t=0}$ .

$$\begin{aligned}\mathbf{w}_{\theta_t^*} - \mathbf{w}_{\theta_0} &:= \nabla_t \mathbf{w}_{\theta_t^*} + o(t) = \nabla_{\theta} \mathbf{w}_{\theta}^{\top} \nabla_t \theta_t^* + o(t), \\ \mathbf{w}_{\theta_t^{\text{KL}}} - \mathbf{w}_{\theta_0} &:= \nabla_t \mathbf{w}_{\theta_t^{\text{KL}}} + o(t) = \nabla_{\theta} \mathbf{w}_{\theta}^{\top} \nabla_t \theta_t^{\text{KL}} + o(t).\end{aligned}$$

964 By Lemma 5, we can get  $\nabla_t \theta_t^*$  and  $\nabla_t \theta_t^{\text{KL}}$  at  $t = 0$ :

$$\begin{aligned}\nabla_t \theta_t^{\text{KL}} &= \mathbf{I}^{-1} \mathbb{E}_{\theta_0}[u(\mathbf{z}) \mathbf{s}_{\theta_0}(\mathbf{z})], \\ \nabla_t \theta_t^* &= -\Phi^{-1} \mathbb{E}_{\theta_0}[u(\mathbf{z}) \nabla_{\theta} c(\mathbf{w}_{\theta_0}, \mathbf{z})].\end{aligned}$$

965 Moreover,

$$\begin{aligned}\nabla_t \mathbf{w}_{\theta_t^{\text{KL}}} &= \nabla_{\theta} \mathbf{w}_{\theta}^{\top} \nabla_t \theta_t^{\text{KL}} = -\mathbf{V}^{-1} \Sigma \mathbf{I}^{-1} \mathbb{E}_{\theta_0}(u(\mathbf{z}) \mathbf{s}_{\theta_0}(\mathbf{z})) = \mathbb{E}_{\theta_0}(u(\mathbf{z}) \text{IF}^{\text{ETO}}(\mathbf{z})), \\ \nabla_t \mathbf{w}_{\theta_t^*} &= \nabla_{\theta} \mathbf{w}_{\theta}^{\top} \nabla_t \theta_t^* = \mathbf{V}^{-1} \Sigma \Phi^{-1} \mathbb{E}_{\theta_0}[u(\mathbf{z}) \nabla_{\theta} c(\mathbf{w}_{\theta_0}, \mathbf{z})] = \mathbb{E}_{\theta_0}(u(\mathbf{z}) \text{IF}^{\text{IEO}}(\mathbf{z})).\end{aligned}$$



966 Finally, for the middle term,

$$\begin{aligned} n^\alpha(\mathbf{w}_{\theta_{t_n}^*} - \mathbf{w}_{\theta_0}) &\rightarrow \mathbb{E}_{\theta_0}(u(\mathbf{z})\text{IF}^{\text{IEO}}(\mathbf{z})), \\ n^\alpha(\mathbf{w}_{\theta_{t_n}^{\text{KL}}} - \mathbf{w}_{\theta_0}) &\rightarrow \mathbb{E}_{\theta_0}(u(\mathbf{z})\text{IF}^{\text{ETO}}(\mathbf{z})), \\ n^\alpha(\mathbf{w}_{t_n}^* - \mathbf{w}_{\theta_0}) &\rightarrow \mathbb{E}_{\theta_0}(u(\mathbf{z})\text{IF}^{\text{SAA}}(\mathbf{z})). \end{aligned}$$

967 For the first term, under Assumption 2  $(\hat{\mathbf{w}}^{\text{ETO}} - \mathbf{w}_{\theta_{t_n}^{\text{KL}}})$ ,  $(\hat{\mathbf{w}}^{\text{IEO}} - \mathbf{w}_{\theta_{t_n}^*})$  and  $(\hat{\mathbf{w}}^{\text{SAA}} - \mathbf{w}_{t_n}^*)$  are all  
968  $O_{Q^n}(1/\sqrt{n})$ , then

$$\begin{aligned} n^\alpha(\hat{\mathbf{w}}^{\text{ETO}} - \mathbf{w}_{\theta_{t_n}^{\text{KL}}}) &\xrightarrow{P} 0, \\ n^\alpha(\hat{\mathbf{w}}^{\text{IEO}} - \mathbf{w}_{\theta_{t_n}^*}) &\xrightarrow{P} 0, \\ n^\alpha(\hat{\mathbf{w}}^{\text{SAA}} - \mathbf{w}_{t_n}^*) &\xrightarrow{P} 0. \end{aligned}$$

969 The assumption is natural because it basically say the empirical part deviates from the expected part  
970 at the rate  $O(1/\sqrt{n})$ . When we multiply  $n^\alpha$ , the term shrinks in probability to 0. In conclusion,

$$n^\alpha(\hat{\mathbf{w}}^\square - \mathbf{w}_n^*) \xrightarrow{P} \mathbf{b}^\square.$$

971 Let us now consider the regret. We use Taylor expansion of the regret with respect to  $\mathbf{w}$  at  $\mathbf{w}_n^*$  and  
972 note that  $\nabla_{\mathbf{w}} v_n(\mathbf{w}_n^*) = 0$  for every  $n$ ,

$$\begin{aligned} v_n(\hat{\mathbf{w}}^\square) - v_n(\mathbf{w}_n^*) &= \frac{1}{2}(\hat{\mathbf{w}}^\square - \mathbf{w}_n^*)^\top \nabla_{\mathbf{w}\mathbf{w}} v_n(\mathbf{w}_n^*)(\hat{\mathbf{w}}^\square - \mathbf{w}_n^*) + o_{Q^n}(\|\hat{\mathbf{w}}^\square - \mathbf{w}_n^*\|^2), \\ n^{2\alpha}(v_n(\hat{\mathbf{w}}^\square) - v_n(\mathbf{w}_n^*)) &= \frac{1}{2}n^\alpha(\hat{\mathbf{w}}^\square - \mathbf{w}_n^*)^\top \nabla_{\mathbf{w}\mathbf{w}} v_n(\mathbf{w}_n^*)n^\alpha(\hat{\mathbf{w}}^\square - \mathbf{w}_n^*) + o_{Q^n}(1). \end{aligned}$$

973 By Assumption 2 that  $\nabla_{\mathbf{w}\mathbf{w}} v_n(\mathbf{w}_n^*) \rightarrow \mathbf{V}$ , the function  $f : \Omega \rightarrow \mathbb{R}$  with  $f(\cdot) := \frac{1}{2}(\cdot)^\top \mathbf{V}(\cdot)$   
974 and function sequence  $f_n : \Omega \rightarrow \mathbb{R}$  with  $f_n(\cdot) := \frac{1}{2}(\cdot)^\top \nabla_{\mathbf{w}\mathbf{w}} v_n(\mathbf{w}_n^*)(\cdot)$  satisfy: for all sequence  
975  $\{\mathbf{w}_n\}_{n=1}^\infty$ , if  $\mathbf{w}_n \rightarrow \mathbf{w}$  for some  $\mathbf{w} \in \Omega$ , then  $f_n(\mathbf{w}_n) \rightarrow f(\mathbf{w})$  since continuity is preserved under  
976 multiplication. Using the extended continuous mapping theorem (Theorem 1.11.1 in van der Vaart  
977 and Wellner [1996]), we have under  $Q^n$ ,

$$n^{2\alpha}(v_n(\hat{\mathbf{w}}^\square) - v_n(\mathbf{w}_n^*)) \xrightarrow{P} \frac{1}{2}(\mathbf{b}^\square)^\top \mathbf{V}\mathbf{b}^\square.$$

978 □

979 *Proof of Theorem 4.* Recall the influence function of SAA, ETO, IEO:

$$\begin{aligned} \text{IF}^{\text{SAA}}(\mathbf{z}) &= -\mathbf{V}^{-1}\nabla_{\mathbf{w}} c(\mathbf{w}_{\theta_0}, \mathbf{z}), \\ \text{IF}^{\text{IEO}}(\mathbf{z}) &= \mathbf{V}^{-1}\Sigma(\Sigma^\top \mathbf{V}^{-1}\Sigma)^{-1}\Sigma^\top \mathbf{V}^{-1}\nabla_{\mathbf{w}} c(\mathbf{w}_{\theta_0}, \mathbf{z}) = -\mathbf{V}^{-1}P_{\Sigma, \mathbf{V}}\nabla_{\mathbf{w}} c(\mathbf{w}_{\theta_0}, \mathbf{z}), \\ \text{IF}^{\text{ETO}}(\mathbf{z}) &= -\mathbf{V}^{-1}\Sigma \mathbf{I}^{-1}\mathbf{s}_{\theta_0}(\mathbf{z}) = -\mathbf{V}^{-1}\Sigma \mathbb{E}_{\theta_0}[\mathbf{s}_{\theta_0}(\mathbf{z})\mathbf{s}_{\theta_0}(\mathbf{z})^\top]\mathbf{s}_{\theta_0}(\mathbf{z}). \end{aligned}$$

980 For regret comparison, since  $\mathbf{b}^{\text{SAA}} = \mathbf{0}$ , we have  $R^{\text{SAA}} = 0$ . Also,  $R^{\text{IEO}} \geq 0$  and  $R^{\text{ETO}} \geq 0$ .

981 By noting that  $\mathbf{V} = \nabla_{\mathbf{w}\mathbf{w}} \mathbb{E}_{\theta_0}[c(\mathbf{w}_{\theta_0}, \mathbf{z})]$ , we observe that

$$\mathbb{E}_{\theta_0}[u(\mathbf{z})\text{IF}^{\text{IEO}}(\mathbf{z})]^\top \mathbf{V} \mathbb{E}_{\theta_0}[u(\mathbf{z})\text{IF}^{\text{IEO}}(\mathbf{z})] = \mathbb{E}_{\theta_0}[u(\mathbf{z})\text{IF}^{\text{IEO}}(\mathbf{z})]^\top \mathbf{V} \mathbb{E}_{\theta_0}[u(\mathbf{z})\text{IF}^{\text{SAA}}(\mathbf{z})].$$

982 This is because

$$\begin{aligned} &\mathbb{E}_{\theta_0}[u(\mathbf{z})\text{IF}^{\text{IEO}}(\mathbf{z})]^\top \mathbf{V} \mathbb{E}_{\theta_0}[u(\mathbf{z})\text{IF}^{\text{IEO}}(\mathbf{z})] \\ &= \left( \mathbb{E}_{\theta_0}[u(\mathbf{z})\nabla_{\mathbf{w}} c(\mathbf{w}_{\theta_0}, \mathbf{z})]^\top \mathbf{V}^{-1}\Sigma(\Sigma^\top \mathbf{V}^{-1}\Sigma)^{-1}\Sigma^\top \mathbf{V}^{-1} \right) \cdot \mathbf{V} \cdot \\ &\quad \left( \mathbf{V}^{-1}\Sigma(\Sigma^\top \mathbf{V}^{-1}\Sigma)^{-1}\Sigma^\top \mathbf{V}^{-1}\mathbb{E}_{\theta_0}[u(\mathbf{z})\nabla_{\mathbf{w}} c(\mathbf{w}_{\theta_0}, \mathbf{z})] \right) \\ &= \mathbb{E}_{\theta_0}[u(\mathbf{z})\nabla_{\mathbf{w}} c(\mathbf{w}_{\theta_0}, \mathbf{z})]^\top \mathbf{V}^{-1}\Sigma(\Sigma^\top \mathbf{V}^{-1}\Sigma)^{-1}\Sigma^\top \mathbf{V}^{-1}\mathbb{E}_{\theta_0}[u(\mathbf{z})\nabla_{\mathbf{w}} c(\mathbf{w}_{\theta_0}, \mathbf{z})] \\ &= \mathbb{E}_{\theta_0}[u(\mathbf{z})\nabla_{\mathbf{w}} c(\mathbf{w}_{\theta_0}, \mathbf{z})]^\top \mathbf{V}^{-1}\mathbf{V}\mathbf{V}^{-1}\Sigma(\Sigma^\top \mathbf{V}^{-1}\Sigma)^{-1}\Sigma^\top \mathbf{V}^{-1}\mathbb{E}_{\theta_0}[u(\mathbf{z})\nabla_{\mathbf{w}} c(\mathbf{w}_{\theta_0}, \mathbf{z})] \\ &= \mathbb{E}_{\theta_0}[u(\mathbf{z})\text{IF}^{\text{SAA}}(\mathbf{z})]^\top \mathbf{V} \mathbb{E}_{\theta_0}[u(\mathbf{z})\text{IF}^{\text{IEO}}(\mathbf{z})] \\ &= \mathbb{E}_{\theta_0}[u(\mathbf{z})\text{IF}^{\text{IEO}}(\mathbf{z})]^\top \mathbf{V} \mathbb{E}_{\theta_0}[u(\mathbf{z})\text{IF}^{\text{SAA}}(\mathbf{z})]. \end{aligned}$$

983 Now let us prove  $R^{\text{ETO}} - R^{\text{IEO}} \geq 0$ .

$$\begin{aligned}
& 2R^{\text{ETO}} \\
&= \mathbb{E}_{\theta_0} [u(z)(\text{IF}^{\text{ETO}}(z) - \text{IF}^{\text{SAA}}(z))]^\top \mathbf{V} \mathbb{E}_{\theta_0} [u(z)(\text{IF}^{\text{ETO}}(z) - \text{IF}^{\text{SAA}}(z))] \\
&= \mathbb{E}_{\theta_0} [u(z)\text{IF}^{\text{ETO}}(z)]^\top \mathbf{V} \mathbb{E}_{\theta_0} [u(z)\text{IF}^{\text{ETO}}(z)] \\
&\quad - 2\mathbb{E}_{\theta_0} [u(z)\text{IF}^{\text{ETO}}(z)]^\top \mathbf{V} \mathbb{E}_{\theta_0} [u(z)\text{IF}^{\text{SAA}}(z)] + \mathbb{E}_{\theta_0} [u(z)\text{IF}^{\text{SAA}}(z)]^\top \mathbf{V} \mathbb{E}_{\theta_0} [u(z)\text{IF}^{\text{SAA}}(z)] \\
& 2R^{\text{IEO}} \\
&= \mathbb{E}_{\theta_0} [u(z)(\text{IF}^{\text{IEO}}(z) - \text{IF}^{\text{SAA}}(z))]^\top \mathbf{V} \mathbb{E}_{\theta_0} [u(z)(\text{IF}^{\text{IEO}}(z) - \text{IF}^{\text{SAA}}(z))] \\
&= \mathbb{E}_{\theta_0} [u(z)\text{IF}^{\text{IEO}}(z)]^\top \mathbf{V} \mathbb{E}_{\theta_0} [u(z)\text{IF}^{\text{IEO}}(z)] \\
&\quad - 2\mathbb{E}_{\theta_0} [u(z)\text{IF}^{\text{IEO}}(z)]^\top \mathbf{V} \mathbb{E}_{\theta_0} [u(z)\text{IF}^{\text{SAA}}(z)] + \mathbb{E}_{\theta_0} [u(z)\text{IF}^{\text{SAA}}(z)]^\top \mathbf{V} \mathbb{E}_{\theta_0} [u(z)\text{IF}^{\text{SAA}}(z)] \\
&= -\mathbb{E}_{\theta_0} [u(z)\text{IF}^{\text{IEO}}(z)]^\top \mathbf{V} \mathbb{E}_{\theta_0} [u(z)\text{IF}^{\text{SAA}}(z)] + \mathbb{E}_{\theta_0} [u(z)\text{IF}^{\text{SAA}}(z)]^\top \mathbf{V} \mathbb{E}_{\theta_0} [u(z)\text{IF}^{\text{SAA}}(z)].
\end{aligned}$$

984 Hence,

$$\begin{aligned}
& 2R^{\text{ETO}} - 2R^{\text{IEO}} \\
&= \mathbb{E}_{\theta_0} [u(z)\text{IF}^{\text{ETO}}(z)]^\top \mathbf{V} \mathbb{E}_{\theta_0} [u(z)\text{IF}^{\text{ETO}}(z)] \\
&\quad - 2\mathbb{E}_{\theta_0} [u(z)\text{IF}^{\text{ETO}}(z)]^\top \mathbf{V} \mathbb{E}_{\theta_0} [u(z)\text{IF}^{\text{SAA}}(z)] + \mathbb{E}_{\theta_0} [u(z)\text{IF}^{\text{IEO}}(z)]^\top \mathbf{V} \mathbb{E}_{\theta_0} [u(z)\text{IF}^{\text{SAA}}(z)] \\
&= \mathbb{E}_{\theta_0} [u(z)s_{\theta_0}(z)]^\top \mathbf{I}^{-1} \boldsymbol{\Sigma}^\top \mathbf{V}^{-1} \mathbf{V} \mathbf{V}^{-1} \boldsymbol{\Sigma} \mathbf{I}^{-1} \mathbb{E}_{\theta_0} [u(z)s_{\theta_0}(z)] \\
&\quad + 2\mathbb{E}_{\theta_0} [u(z)s_{\theta_0}(z)]^\top \mathbf{I}^{-1} \boldsymbol{\Sigma}^\top \mathbf{V}^{-1} \mathbf{V} \mathbf{V}^{-1} \mathbb{E}_{\theta_0} [u(z)\nabla_{\mathbf{w}} c(\mathbf{w}_{\theta_0}, z)] \\
&\quad + \mathbb{E}_{\theta_0} [u(z)\nabla_{\mathbf{w}} c(\mathbf{w}_{\theta_0}, z)]^\top \mathbf{V}^{-1} \boldsymbol{\Sigma} (\boldsymbol{\Sigma}^\top \mathbf{V}^{-1} \boldsymbol{\Sigma})^{-1} \boldsymbol{\Sigma}^\top \mathbf{V}^{-1} \mathbb{E}_{\theta_0} [u(z)\nabla_{\mathbf{w}} c(\mathbf{w}_{\theta_0}, z)] \\
&= \mathbb{E}_{\theta_0} [u(z)s_{\theta_0}(z)]^\top \mathbf{I}^{-1} (\boldsymbol{\Sigma}^\top \mathbf{V}^{-1} \boldsymbol{\Sigma}) \mathbf{I}^{-1} \mathbb{E}_{\theta_0} [u(z)s_{\theta_0}(z)] \\
&\quad + 2\mathbb{E}_{\theta_0} [u(z)s_{\theta_0}(z)]^\top \mathbf{I}^{-1} \boldsymbol{\Sigma}^\top \mathbf{V}^{-1} \mathbb{E}_{\theta_0} [u(z)\nabla_{\mathbf{w}} c(\mathbf{w}_{\theta_0}, z)] \\
&\quad + \mathbb{E}_{\theta_0} [u(z)\nabla_{\mathbf{w}} c(\mathbf{w}_{\theta_0}, z)]^\top \mathbf{V}^{-1} \boldsymbol{\Sigma} (\boldsymbol{\Sigma}^\top \mathbf{V}^{-1} \boldsymbol{\Sigma})^{-1} \boldsymbol{\Sigma}^\top \mathbf{V}^{-1} \mathbb{E}_{\theta_0} [u(z)\nabla_{\mathbf{w}} c(\mathbf{w}_{\theta_0}, z)] \\
&= \left\| (\boldsymbol{\Sigma}^\top \mathbf{V}^{-1} \boldsymbol{\Sigma})^{1/2} \mathbf{I}^{-1} \boldsymbol{\Sigma}^\top \mathbf{V}^{-1} \mathbb{E}_{\theta_0} [u(z)\nabla_{\mathbf{w}} c(\mathbf{w}_{\theta_0}, z)] - (\boldsymbol{\Sigma}^\top \mathbf{V}^{-1} \boldsymbol{\Sigma})^{-1/2} \boldsymbol{\Sigma}^\top \mathbf{V}^{-1} \mathbb{E}_{\theta_0} [u(z)\nabla_{\mathbf{w}} c(\mathbf{w}_{\theta_0}, z)] \right\|^2 \\
&\geq 0.
\end{aligned}$$

985 The last equality is from the fact that

$$\mathbf{x}^\top \mathbf{A} \mathbf{x} - 2\mathbf{x}^\top \mathbf{y} + \mathbf{y}^\top \mathbf{A}^{-1} \mathbf{y} = \left( \mathbf{A}^{\frac{1}{2}} \mathbf{x} - \mathbf{A}^{-\frac{1}{2}} \mathbf{y} \right)^\top \left( \mathbf{A}^{\frac{1}{2}} \mathbf{x} - \mathbf{A}^{-\frac{1}{2}} \mathbf{y} \right).$$

986 In conclusion, we have

$$R^{\text{ETO}} \geq R^{\text{IEO}} \geq R^{\text{SAA}} = 0.$$

987 By the definition of  $\mathbf{b}^\square$  and  $R^\square$ , we know  $\|\mathbf{b}^\square\|_{\mathbf{V}} = \sqrt{2R^\square}$ . Hence, by the monotonicity of square  
988 root function, we have  $0 = \|\mathbf{b}^{\text{SAA}}\|_{\mathbf{V}} \leq \|\mathbf{b}^{\text{IEO}}\|_{\mathbf{V}} \leq \|\mathbf{b}^{\text{ETO}}\|_{\mathbf{V}}$ .  $\square$

989 *Proof of Theorem 5.* Part (i): We note that when  $u(z) = \boldsymbol{\beta}^\top s_{\theta_0}(z)$  for some  $\boldsymbol{\beta} \in \mathbb{R}^{d_\theta}$ ,

$$\begin{aligned}
& \mathbf{b}^{\text{ETO}} \\
&= \mathbb{E}_{\theta_0} [u(z)\text{IF}^{\text{ETO}}(z)] - \mathbb{E}_{\theta_0} [u(z)\text{IF}^{\text{SAA}}(z)] \\
&= \mathbf{V}^{-1} \mathbb{E}_{\theta_0} [\nabla_{\mathbf{w}} c(\mathbf{w}_{\theta_0}, z) s_{\theta_0}(z)^\top] (\mathbb{E}_{\theta_0} [s_{\theta_0}(z) s_{\theta_0}(z)^\top])^{-1} \mathbb{E}_{\theta_0} [u(z) s_{\theta_0}(z)] - \mathbf{V}^{-1} \mathbb{E}_{\theta_0} [u(z) \nabla_{\mathbf{w}} c(\mathbf{w}_{\theta_0}, z)] \\
&= \mathbf{V}^{-1} \mathbb{E}_{\theta_0} [\nabla_{\mathbf{w}} c(\mathbf{w}_{\theta_0}, z) s_{\theta_0}(z)^\top] (\mathbb{E}_{\theta_0} [s_{\theta_0}(z) s_{\theta_0}(z)^\top])^{-1} \mathbb{E}_{\theta_0} [\boldsymbol{\beta}^\top s_{\theta_0}(z) s_{\theta_0}(z)] - \mathbf{V}^{-1} \mathbb{E}_{\theta_0} [\boldsymbol{\beta}^\top s_{\theta_0}(z) \nabla_{\mathbf{w}} c(\mathbf{w}_{\theta_0}, z)] \\
&= \mathbf{V}^{-1} \mathbb{E}_{\theta_0} [\nabla_{\mathbf{w}} c(\mathbf{w}_{\theta_0}, z) s_{\theta_0}(z)^\top] (\mathbb{E}_{\theta_0} [s_{\theta_0}(z) s_{\theta_0}(z)^\top])^{-1} \mathbb{E}_{\theta_0} [s_{\theta_0}(z) s_{\theta_0}(z)^\top \boldsymbol{\beta}] - \mathbf{V}^{-1} \mathbb{E}_{\theta_0} [\nabla_{\mathbf{w}} c(\mathbf{w}_{\theta_0}, z) s_{\theta_0}(z)^\top \boldsymbol{\beta}] \\
&= \mathbf{V}^{-1} \mathbb{E}_{\theta_0} [\nabla_{\mathbf{w}} c(\mathbf{w}_{\theta_0}, z) s_{\theta_0}(z)^\top] (\mathbb{E}_{\theta_0} [s_{\theta_0}(z) s_{\theta_0}(z)^\top])^{-1} \mathbb{E}_{\theta_0} [s_{\theta_0}(z) s_{\theta_0}(z)^\top \boldsymbol{\beta}] - \mathbf{V}^{-1} \mathbb{E}_{\theta_0} [\nabla_{\mathbf{w}} c(\mathbf{w}_{\theta_0}, z) s_{\theta_0}(z)^\top \boldsymbol{\beta}] \\
&= \mathbf{V}^{-1} \mathbb{E}_{\theta_0} [\nabla_{\mathbf{w}} c(\mathbf{w}_{\theta_0}, z) s_{\theta_0}(z)^\top] \boldsymbol{\beta} - \mathbf{V}^{-1} \mathbb{E}_{\theta_0} [\nabla_{\mathbf{w}} c(\mathbf{w}_{\theta_0}, z) s_{\theta_0}(z)^\top] \boldsymbol{\beta} \\
&= 0.
\end{aligned}$$

990  $\square$

991 To prove Theorem 1, we need a useful result here. When  $\alpha = 1/2$ , we can show that the log-likelihood  
 992 ratio is asymptotically normal characterized by the mean and variance of the perturbation direction.  
 993 This result is used to convert the asymptotics in  $P^n$  to  $Q^n$  by conducting a change of measure  
 994 from  $P^n$  to  $Q^n$ , and also contributes to the overall asymptotically normal limit of the decision that  
 995 encompasses the bias term. It will also be leveraged later to prove results in the mild misspecification  
 996 case.

997 **Lemma 6** (Log Likelihood Ratio Property in Definition 1[Duchi, 2021]). *Under Definition 2, when*  
 998  *$\alpha = 1/2$ , i.e.,  $Q^n = Q_{1/\sqrt{n}}^{\otimes n}$ , the log-likelihood ratio between  $Q^n$  and  $P^n$  satisfies:*

$$\log \frac{dQ^n(z_1, \dots, z_n)}{dP^n(z_1, \dots, z_n)} = \frac{1}{\sqrt{n}} \sum_{i=1}^n u(z_i) - \frac{1}{2} \mathbb{E}_{\theta_0}[u^2] + o_{P^n}(1).$$

999 *Proof of Theorem 1.* By Lemma 2 and Proposition 1, under  $P^n$ , we have a joint central limit theorem

$$\begin{bmatrix} \sqrt{n}(\hat{\mathbf{w}}^\square - \mathbf{w}_{\theta_0}) \\ \log \frac{dQ^n}{dP^n} \end{bmatrix} \xrightarrow{P^n} N \left( \begin{bmatrix} 0 \\ -\frac{1}{2} \mathbb{E}_{\theta_0}(u^2) \end{bmatrix}, \begin{bmatrix} \text{var}_{\theta_0}(\text{IF}^\square(\mathbf{z})) & \mathbb{E}_{\theta_0}[u(\mathbf{z})\text{IF}^\square(\mathbf{z})] \\ \mathbb{E}_{\theta_0}[u(\mathbf{z})\text{IF}^\square(\mathbf{z})^\top] & \mathbb{E}_{\theta_0}(u^2) \end{bmatrix} \right).$$

1000 Using LeCam's third lemma, we change the measure from  $P^n$  to  $Q^n$  and get that under  $Q^n$ ,

$$\sqrt{n}(\hat{\mathbf{w}}^\square - \mathbf{w}_{\theta_0}) \xrightarrow{Q^n} N(\mathbb{E}_{\theta_0}[u(\mathbf{z})\text{IF}^\square(\mathbf{z})], \text{var}_{\theta_0}(\text{IF}^\square(\mathbf{z}))).$$

1001 Next, by Lemma 4 (note that this is not a stochastic convergence but deterministic sequence  
 1002 convergence)

$$\sqrt{n}(\mathbf{w}_n^* - \mathbf{w}_{\theta_0}) \rightarrow \mathbb{E}_{\theta_0}[u(\mathbf{z})\text{IF}^{\text{SAA}}(\mathbf{z})].$$

1003 In conclusion,

$$\sqrt{n}(\hat{\mathbf{w}}^\square - \mathbf{w}_n^*) = \sqrt{n}(\hat{\mathbf{w}}^\square - \mathbf{w}_{\theta_0}) - \sqrt{n}(\mathbf{w}_n^* - \mathbf{w}_{\theta_0}) \xrightarrow{Q^n} N(\mathbf{b}^\square, \text{var}_{\theta_0}(\text{IF}^\square(\mathbf{z}))).$$

1004 Let us now consider the regret. We use Taylor expansion of the regret with respect to  $\mathbf{w}$  at  $\mathbf{w}_n^*$  and  
 1005 note that  $\nabla_{\mathbf{w}} v_n(\mathbf{w}_n^*) = 0$  for every  $n$ ,

$$\begin{aligned} v_n(\hat{\mathbf{w}}^\square) - v_n(\mathbf{w}_n^*) &= \frac{1}{2}(\hat{\mathbf{w}}^\square - \mathbf{w}_n^*)^\top \nabla_{\mathbf{w}\mathbf{w}} v_n(\mathbf{w}_n^*)(\hat{\mathbf{w}}^\square - \mathbf{w}_n^*) + o_{Q^n}(\|\hat{\mathbf{w}}^\square - \mathbf{w}_n^*\|^2), \\ n(v_n(\hat{\mathbf{w}}^\square) - v_n(\mathbf{w}_n^*)) &= \frac{1}{2} \sqrt{n}(\hat{\mathbf{w}}^\square - \mathbf{w}_n^*)^\top \nabla_{\mathbf{w}\mathbf{w}} v_n(\mathbf{w}_n^*) \sqrt{n}(\hat{\mathbf{w}}^\square - \mathbf{w}_n^*) + o_{Q^n}(1). \end{aligned}$$

1006 By Assumption 2 that  $\nabla_{\mathbf{w}\mathbf{w}} v_n(\mathbf{w}_n^*) \rightarrow \mathbf{V}$ , the function  $f : \Omega \rightarrow \mathbb{R}$  with  $f(\cdot) := \frac{1}{2}(\cdot)^\top \mathbf{V}(\cdot)$   
 1007 and function sequence  $f_n : \Omega \rightarrow \mathbb{R}$  with  $f_n(\cdot) := \frac{1}{2}(\cdot)^\top \nabla_{\mathbf{w}\mathbf{w}} v_n(\mathbf{w}_n^*)(\cdot)$  satisfy: for all sequence  
 1008  $\{\mathbf{w}_n\}_{n=1}^\infty$ , if  $\mathbf{w}_n \rightarrow \mathbf{w}$  for some  $\mathbf{w} \in \Omega$ , then  $f_n(\mathbf{w}_n) \rightarrow f(\mathbf{w})$  since continuity is preserved under  
 1009 multiplication. Using the extended continuous mapping theorem (Theorem 1.11.1 in van der Vaart  
 1010 and Wellner [1996]), we have under  $Q^n$ ,

$$n(v_n(\hat{\mathbf{w}}^\square) - v_n(\mathbf{w}_n^*)) \xrightarrow{Q^n} \frac{1}{2} N^\square \mathbf{V} N^\square.$$

1011 □

1012 *Proof of Theorem 2.* Recall that:

$$\sqrt{n}(\hat{\mathbf{w}}^\square - \mathbf{w}_n^*) \xrightarrow{Q^n} N^\square := N(\mathbf{b}^\square, \text{var}_{\theta_0}(\text{IF}^\square(\mathbf{z}))).$$

1013

$$n(v_n(\hat{\mathbf{w}}^\square) - v_n(\mathbf{w}_n^*)) \xrightarrow{Q^n} \mathbb{G}^\square := \frac{1}{2} (N^\square)^\top \mathbf{V} N^\square.$$

1014 By denoting  $\mathbf{b}^\square$  as  $\mathbb{E}_{\theta_0}(u(\mathbf{z})(\text{IF}^\square(\mathbf{z}) - \text{IF}^{\text{SAA}}(\mathbf{z})))$ , we can rewrite  $\mathbb{G}^\square$  as

$$\begin{aligned} &\mathbb{G}^\square \\ &= \frac{1}{2} \left( N(0, \text{var}_{\theta_0}(\text{IF}^\square(\mathbf{z}))) - \mathbf{b}^\square \right)^\top \mathbf{V} \left( N(0, \text{var}_{\theta_0}(\text{IF}^\square(\mathbf{z}))) - \mathbf{b}^\square \right) \\ &= \frac{1}{2} \left[ N(0, \text{var}_{\theta_0}(\text{IF}^\square(\mathbf{z})))^\top \mathbf{V} N(0, \text{var}_{\theta_0}(\text{IF}^\square(\mathbf{z}))) - 2 \left( \mathbf{b}^\square \right)^\top \mathbf{V} N(0, \text{var}_{\theta_0}(\text{IF}^\square(\mathbf{z}))) + \left( \mathbf{b}^\square \right)^\top \mathbf{V} \mathbf{b}^\square \right]. \end{aligned}$$

1015 By taking the expectation, the cross term is zero. Hence,

$$\mathbb{E}(\mathbb{G}^\square) = \frac{1}{2} \left[ \mathbb{E} \left[ N(0, \text{var}_{\theta_0}(\text{IF}^\square(z)))^\top \mathbf{V} N(0, \text{var}_{\theta_0}(\text{IF}^\square(z))) \right] + (\mathbf{b}^\square)^\top \mathbf{V} \mathbf{b}^\square \right].$$

1016 Since  $\text{var}_{\theta_0}(\text{IF}^{\text{ETO}}(z)) \leq \text{var}_{\theta_0}(\text{IF}^{\text{IEO}}(z)) \leq \text{var}_{\theta_0}(\text{IF}^{\text{SAA}}(z))$ , we know the stochastic dominance  
1017 of the SAA, IEO and ETO, and their corresponding expectation.

$$\begin{aligned} & N(0, \text{var}_{\theta_0}(\text{IF}^{\text{ETO}}(z)))^\top \mathbf{V} N(0, \text{var}_{\theta_0}(\text{IF}^{\text{ETO}}(z))) \\ & \preceq_{\text{st}} N(0, \text{var}_{\theta_0}(\text{IF}^{\text{IEO}}(z)))^\top \mathbf{V} N(0, \text{var}_{\theta_0}(\text{IF}^{\text{IEO}}(z))) \\ & \preceq_{\text{st}} N(0, \text{var}_{\theta_0}(\text{IF}^{\text{SAA}}(z)))^\top \mathbf{V} N(0, \text{var}_{\theta_0}(\text{IF}^{\text{SAA}}(z))) \end{aligned}$$

1018 and

$$\begin{aligned} & \mathbb{E} \left[ N(0, \text{var}_{\theta_0}(\text{IF}^{\text{ETO}}(z)))^\top \mathbf{V} N(0, \text{var}_{\theta_0}(\text{IF}^{\text{ETO}}(z))) \right] \\ & \leq \mathbb{E} \left[ N(0, \text{var}_{\theta_0}(\text{IF}^{\text{IEO}}(z)))^\top \mathbf{V} N(0, \text{var}_{\theta_0}(\text{IF}^{\text{IEO}}(z))) \right] \\ & \leq \mathbb{E} \left[ N(0, \text{var}_{\theta_0}(\text{IF}^{\text{SAA}}(z)))^\top \mathbf{V} N(0, \text{var}_{\theta_0}(\text{IF}^{\text{SAA}}(z))) \right]. \end{aligned}$$

1019 From pervious analysis, we already know

$$(\mathbf{b}^{\text{ETO}})^\top \mathbf{V} \mathbf{b}^{\text{ETO}} \geq (\mathbf{b}^{\text{IEO}})^\top \mathbf{V} \mathbf{b}^{\text{IEO}} \geq (\mathbf{b}^{\text{SAA}})^\top \mathbf{V} \mathbf{b}^{\text{SAA}}.$$

1020 Therefore,  $\mathbb{E}(\mathbb{G}^\square)$  consist of two terms. For the first term, ETO is less than IEO, and IEO is less than  
1021 SAA. For the second term, the direction is flipped.  $\square$

1022 Proposition 1 was essentially established by Elmachtoub et al. [2023], but here, we express the  
1023 asymptotic behaviors of solutions more explicitly in terms of influence functions. Moreover, these  
1024 more explicit expressions arise from a new projection interpretation of influence functions that  
1025 allows us to describe the performances geometrically, providing another perspective different from  
1026 Elmachtoub et al. [2023].

To this end, let  $\mathbf{P}$  be the projection matrix onto the column span of  $\Sigma$  with respect to the norm  $\|\mathbf{x}\|_{\mathbf{V}^{-1}}$ , i.e.,

$$\mathbf{P}\mathbf{x} = \underset{\mathbf{y}:\mathbf{y} \in \text{col}(\Sigma)}{\text{argmin}} \|\mathbf{y} - \mathbf{x}\|_{\mathbf{V}^{-1}}^2,$$

which has a closed-form expression  $\mathbf{P} = \Sigma (\Sigma^\top \mathbf{V}^{-1} \Sigma)^{-1} \Sigma^\top \mathbf{V}^{-1}$ . Second, define the functional  $\mathcal{T} : L_2(P_{\theta_0})^{d_w} \rightarrow L_2(P_{\theta_0})^{d_w}$  as the projection operator onto the linear function subspace  $\{\mathbf{A} \mathbf{s}_{\theta_0}(z) : \mathbf{A} \in \mathbb{R}^{d_w \times d_\theta}\}$ , i.e., for a square integrable function  $\mathbf{f}(z) : \mathcal{Z} \rightarrow \mathbb{R}^{d_w}$ ,

$$\mathcal{T}\mathbf{f} = \underset{\mathbf{g}:\mathbf{g}=\mathbf{A}\mathbf{s}_{\theta_0}(z)}{\text{argmin}} \int \|\mathbf{f}(z) - \mathbf{g}(z)\|^2 p_{\theta_0}(z) dz.$$

1027 **Theorem 7.** Under Assumptions 1, 3 and 4, the influence functions of IEO and ETO have the  
1028 following projection interpretation.

1029 1.  $\text{IF}^{\text{IEO}}(z) = -\mathbf{V}^{-1} \mathbf{P} \nabla_{\mathbf{w}} c(\mathbf{w}_{\theta_0}, z),$

1030 2.  $\text{IF}^{\text{ETO}}(z) = -\mathbf{V}^{-1} \mathcal{T} \nabla_{\mathbf{w}} c(\mathbf{w}_{\theta_0}, z).$

1031 The above theorem points out that the influence functions of IEO and ETO are essentially projections  
1032 of that of SAA, either in vector or function spaces, shedding light on the ordering of their variances  
1033 by the contraction properties of projections.

1034 *Proof of Theorem 7.* The fact that

$$\text{IF}^{\text{IEO}}(z) = -\mathbf{V}^{-1} \mathbf{P} \nabla_{\mathbf{w}} c(\mathbf{w}_{\theta_0}, z)$$

1035 is because

$$\begin{aligned} \text{IF}^{\text{IEO}}(z) &= \mathbf{V}^{-1} \Sigma \Phi^{-1} \nabla_{\theta} c(\mathbf{w}_{\theta_0}, z) \\ &= \mathbf{V}^{-1} \Sigma (\nabla_{\theta} \mathbf{w}_{\theta_0} \mathbf{V} \nabla_{\theta} \mathbf{w}_{\theta_0}^\top)^{-1} \nabla_{\theta} \mathbf{w}_{\theta_0} \nabla_{\mathbf{w}} c(\mathbf{w}_{\theta_0}, z) \\ &= \mathbf{V}^{-1} \Sigma (\Sigma^\top \mathbf{V}^{-1} \mathbf{V} \mathbf{V}^{-1} \Sigma)^{-1} (-\Sigma^\top \mathbf{V}^{-1}) \nabla_{\mathbf{w}} c(\mathbf{w}_{\theta_0}, z) \\ &= -\mathbf{V}^{-1} \mathbf{P}_{\Sigma, \mathbf{V}} \nabla_{\mathbf{w}} c(\mathbf{w}_{\theta_0}, z). \end{aligned}$$

1036 We then show the relationship between  $\text{IF}^{\text{ETO}}(\mathbf{z})$  and  $\text{IF}^{\text{SAA}}(\mathbf{z})$ . Let  $\mathcal{T} : L_2(p_{\theta_0})^{d_w} \rightarrow L_2(p_{\theta_0})^{d_\theta}$   
 1037 be the projection matrix on the linear function subspace  $\{\mathbf{A}\mathbf{s}_{\theta_0}(\mathbf{z}) : \mathbf{A} \in \mathbb{R}^{d_w \times d_\theta}\}$ , i.e., for general  
 1038 function  $\mathbf{f}(\mathbf{z}) : \mathcal{Z} \rightarrow \mathbb{R}^{d_\theta}$ ,

$$\mathcal{T}\mathbf{f} = \underset{\mathbf{g}:\mathbf{g}=\mathbf{A}\mathbf{s}_{\theta_0}(\mathbf{z})}{\text{argmin}} \int \|\mathbf{f}(\mathbf{z}) - \mathbf{g}(\mathbf{z})\|^2 p_{\theta_0}(\mathbf{z}) d\mathbf{z}.$$

1039 The influence function of ETO is also a projection, i.e.,

$$\text{IF}^{\text{ETO}}(\mathbf{z}) = \mathbf{V}^{-1} \mathcal{T} \nabla_{\mathbf{w}} c(\mathbf{w}_{\theta_0}, \mathbf{z}).$$

1040 The reason is as follows. For ETO, it suffices to prove the following fact:

$$\mathcal{T}\mathbf{f} = \mathbb{E}_{\theta_0}(\mathbf{f}\mathbf{s}_{\theta_0}^\top) \mathbf{I}^{-1} \mathbf{s}_{\theta_0}(\mathbf{z})$$

1041 since  $\mathbf{\Sigma} = \mathbb{E}[\nabla_{\mathbf{w}} c(\mathbf{w}_{\theta_0}, \mathbf{z}) \mathbf{s}_{\theta_0}(\mathbf{z})]$ . To prove the fact, we need to show that  $\mathbf{A}^* =$   
 1042  $\mathbb{E}_{\theta_0}(\mathbf{f}(\mathbf{z}) \mathbf{s}_{\theta_0}(\mathbf{z})^\top) \mathbf{I}^{-1}$  is the minimizer of the optimization problem

$$\min_{\mathbf{A} \in \mathbb{R}^{d_w \times d_\theta}} \int \|\mathbf{f}(\mathbf{z}) - \mathbf{A}\mathbf{s}_{\theta_0}(\mathbf{z})\|^2 p_{\theta_0}(\mathbf{z}) d\mathbf{z}.$$

1043 Since this is essentially a quadratic optimization problem, the stationary point is the global minimum.  
 1044 Denote the objective function  $h(\mathbf{A})$  and we require  $\nabla_{\mathbf{A}} h(\mathbf{A}^*) = 0$ . In other words, for all  $\tilde{i}, \tilde{j}$ ,  
 1045  $\partial h(\mathbf{A}) / \partial A_{\tilde{i}, \tilde{j}} = 0$ . For simplicity, we write  $p_{\theta_0}(\mathbf{z})$  as  $p(\mathbf{z})$  and  $\mathbf{s}_{\theta_0}(\mathbf{z})$  as  $\mathbf{s}(\mathbf{z})$ . Note that

$$\begin{aligned} h(\mathbf{A}) &= \int_{\mathbf{z} \in \mathcal{Z}} \sum_{i=1}^{d_w} (f_i(\mathbf{z}) - \sum_{j=1}^{d_\theta} A_{ij} s_j(\mathbf{z}))^2 p(\mathbf{z}) d\mathbf{z} \\ &= \sum_{i=1}^{d_w} \int_{\mathbf{z} \in \mathcal{Z}} \left[ f_i(\mathbf{z})^2 + \left( \sum_{j=1}^{d_\theta} A_{ij} s_j(\mathbf{z}) \right)^2 - 2f_i(\mathbf{z}) \sum_{j=1}^{d_\theta} A_{ij} s_j(\mathbf{z}) \right] p(\mathbf{z}) d\mathbf{z} \end{aligned}$$

1046 We have

$$\partial h(\mathbf{A}^*) / \partial A_{\tilde{i}, \tilde{j}} = \int_{\mathbf{z} \in \mathcal{Z}} \left[ -2f_{\tilde{i}}(\mathbf{z}) s_{\tilde{j}}(\mathbf{z}) + \left[ 2 \sum_{j=1}^{d_\theta} A_{\tilde{i}j} s_j(\mathbf{z}) \right] \right] p(\mathbf{z}) d\mathbf{z} = 0.$$

1047 For all  $\tilde{i}, \tilde{j}$ , we have

$$\int_{\mathbf{z} \in \mathcal{Z}} f_{\tilde{i}}(\mathbf{z}) s_{\tilde{j}}(\mathbf{z}) p(\mathbf{z}) d\mathbf{z} = \int_{\mathbf{z} \in \mathcal{Z}} \sum_{j=1}^{d_\theta} A_{\tilde{i}j} s_j(\mathbf{z}) s_{\tilde{j}}(\mathbf{z}) p(\mathbf{z}) d\mathbf{z}.$$

1048 Writing in a matrix form, the left hand side is  $\mathbb{E}_{\theta_0}(\mathbf{f}(\mathbf{z}) \mathbf{s}(\mathbf{z})^\top)$ . The write hand side is  
 1049  $\mathbb{E}_{\theta_0}[\mathbf{A}^* \mathbf{s}(\mathbf{z}) \mathbf{s}(\mathbf{z})^\top] = \mathbf{A}^* \mathbb{E}_{\theta_0}(\mathbf{s}(\mathbf{z}) \mathbf{s}(\mathbf{z})^\top) = \mathbf{A}^* \mathbf{I}$ . In conclusion,  $\mathbf{A}^* = \mathbb{E}(\mathbf{f}(\mathbf{z}) \mathbf{s}(\mathbf{z})^\top) \mathbf{I}^{-1}$  and  
 1050  $\mathcal{T}\mathbf{f} = \mathbb{E}(\mathbf{f}(\mathbf{z}) \mathbf{s}_{\theta_0}(\mathbf{z})^\top) \mathbf{I}^{-1} \mathbf{s}_{\theta_0}(\mathbf{z})$ .  $\square$

1051 *Proof of Lemma 1.* The first identity follows from

$$\begin{aligned} \mathbf{\Sigma}^\top &= \nabla_{\theta} \nabla_{\mathbf{w}} v(\mathbf{w}, \theta) |_{\mathbf{w}=\mathbf{w}_{\theta_0}, \theta=\theta_0} \\ &= \nabla_{\theta} \mathbb{E}_{\theta}[\nabla_{\mathbf{w}} c(\mathbf{w}, \mathbf{z})] |_{\theta=\theta_0, \mathbf{w}=\mathbf{w}_{\theta_0}} \\ &= \nabla_{\theta} \int \nabla_{\mathbf{w}} c(\mathbf{w}_{\theta_0}, \mathbf{z}) p_{\theta_0}(\mathbf{z}) d\mathbf{z} \\ &= \int \nabla_{\theta} p_{\theta_0}(\mathbf{z}) \nabla_{\mathbf{w}} c(\mathbf{w}_{\theta_0}, \mathbf{z})^\top d\mathbf{z} \\ &= \int (\nabla_{\theta} \log p_{\theta_0}(\mathbf{z})) p_{\theta_0}(\mathbf{z}) (\nabla_{\mathbf{w}} c(\mathbf{w}_{\theta_0}, \mathbf{z}))^\top d\mathbf{z} \\ &= \mathbb{E}_{\theta_0}[\mathbf{s}_{\theta_0}(\mathbf{z}) (\nabla_{\mathbf{w}} c(\mathbf{w}_{\theta_0}, \mathbf{z}))^\top]. \end{aligned}$$

1052 For the second identity, by implicit function theorem and applying Barratt [2018], we can prove the  
 1053 first identity

$$\begin{aligned} \mathbf{0} &= \nabla_{\mathbf{w}\mathbf{w}} v(\mathbf{w}, \boldsymbol{\theta}_0)|_{\mathbf{w}=\mathbf{w}_{\theta_0}} (\nabla_{\boldsymbol{\theta}} \mathbf{w}_{\boldsymbol{\theta}}|_{\boldsymbol{\theta}=\boldsymbol{\theta}_0})^\top + \nabla_{\mathbf{w}} \nabla_{\boldsymbol{\theta}} v(\mathbf{w}, \boldsymbol{\theta})|_{\mathbf{w}=\mathbf{w}_{\theta_0}, \boldsymbol{\theta}=\boldsymbol{\theta}_0}, \\ \Rightarrow \nabla_{\boldsymbol{\theta}} \mathbf{w}_{\boldsymbol{\theta}}|_{\boldsymbol{\theta}=\boldsymbol{\theta}_0} &= -\nabla_{\boldsymbol{\theta}} \nabla_{\mathbf{w}} v(\mathbf{w}, \boldsymbol{\theta})|_{\mathbf{w}=\mathbf{w}_{\theta_0}, \boldsymbol{\theta}=\boldsymbol{\theta}_0} \cdot \nabla_{\mathbf{w}\mathbf{w}} v(\mathbf{w}, \boldsymbol{\theta})^{-1}|_{\mathbf{w}=\mathbf{w}_{\theta_0}}, \\ &= -\boldsymbol{\Sigma}^\top \mathbf{V}^{-1}. \end{aligned}$$

1054 The third identity follows since

$$\begin{aligned} \Phi &= \nabla_{\boldsymbol{\theta}\boldsymbol{\theta}} \mathbb{E}_{\boldsymbol{\theta}_0} [c(\mathbf{w}_{\boldsymbol{\theta}_0}, \mathbf{z})] \\ &= \nabla_{\boldsymbol{\theta}} (\nabla_{\mathbf{w}} \mathbb{E}_{\boldsymbol{\theta}_0} [c(\mathbf{w}_{\boldsymbol{\theta}}, \mathbf{z})] \nabla_{\boldsymbol{\theta}} \mathbf{w}_{\boldsymbol{\theta}}^\top) |_{\boldsymbol{\theta}=\boldsymbol{\theta}_0} \\ &= \nabla_{\boldsymbol{\theta}} \mathbf{w}_{\boldsymbol{\theta}} \nabla_{\mathbf{w}\mathbf{w}} \mathbb{E}_{\boldsymbol{\theta}_0} [c(\mathbf{w}_{\boldsymbol{\theta}_0}, \mathbf{z})] \nabla_{\boldsymbol{\theta}} \mathbf{w}_{\boldsymbol{\theta}}^\top \\ &= (-\boldsymbol{\Sigma}^\top \mathbf{V}^{-1}) \mathbf{V} (-\boldsymbol{\Sigma}^\top \mathbf{V}^{-1})^\top \\ &= \boldsymbol{\Sigma}^\top \mathbf{V}^{-1} \boldsymbol{\Sigma} \end{aligned}$$

1055 by noting that  $\nabla_{\mathbf{w}} \mathbb{E}_{\boldsymbol{\theta}_0} [c(\mathbf{w}_{\boldsymbol{\theta}_0}, \mathbf{z})] = \mathbf{0}$  since  $\mathbf{w}_{\boldsymbol{\theta}_0}$  is the minimizer of the function  $\mathbf{w} \rightarrow \mathbb{E}_{\boldsymbol{\theta}_0} [c(\mathbf{w}, \mathbf{z})]$ .  
 1056  $\square$

*Proof of Lemma 2.*

$$\log \frac{dQ^n(\mathbf{z}_1, \dots, \mathbf{z}_n)}{dP^n(\mathbf{z}_1, \dots, \mathbf{z}_n)} = \log \prod_{i=1}^n \frac{\exp(u(\mathbf{z}_i)/\sqrt{n})}{C_{1/\sqrt{n}}} = \frac{1}{\sqrt{n}} \sum_{i=1}^n u(\mathbf{z}_i) - n \log C_{1/\sqrt{n}}.$$

It now suffices to show that  $n \log C_{1/\sqrt{n}} = \frac{1}{2} \mathbb{E}_{\boldsymbol{\theta}_0} [u^2] + o_{P^n}(1)$ . From the definition of  $C_t$ , we know

$$C_t = \int \exp(tu(\mathbf{z})) dP_{\boldsymbol{\theta}_0}(\mathbf{z}).$$

Taking the derivative, we have

$$(C_t)'|_{t=0} = \int \exp(tu(\mathbf{z})) u(\mathbf{z}) dP_{\boldsymbol{\theta}_0}(\mathbf{z})|_{t=0} = \mathbb{E}_{\boldsymbol{\theta}_0}(u(\mathbf{z})) = 0.$$

Taking the second order derivative, we have

$$(C_t)''|_{t=0} = \int \exp(tu(\mathbf{z})) u(\mathbf{z}) u(\mathbf{z}) dP_{\boldsymbol{\theta}_0}(\mathbf{z})|_{t=0} = \mathbb{E}_{\boldsymbol{\theta}_0}(u^2).$$

By Tolor expansion, we have

$$C_t = 1 + \frac{1}{2} \mathbb{E}_{\boldsymbol{\theta}_0} [u^2] t^2 + o(t^2)$$

1057 In conclusion,

$$\begin{aligned} n \log C_{1/\sqrt{n}} &= n \log \left( 1 + \frac{1}{2} \frac{1}{\sqrt{n}} \mathbb{E}_{\boldsymbol{\theta}_0} [u^2] \frac{1}{\sqrt{n}} + o\left(\frac{1}{n}\right) \right) = n \left( \frac{1}{2} \frac{1}{\sqrt{n}} \mathbb{E}_{\boldsymbol{\theta}_0} [u^2] \frac{1}{\sqrt{n}} + o\left(\frac{1}{n}\right) \right) \\ &= \frac{1}{2} \mathbb{E}_{\boldsymbol{\theta}_0} [u^2] + o(1). \end{aligned}$$

1058  $\square$
